# 1 Isthmal stem cells sustain intestinal homeostasis and regeneration

2 Malagola E.<sup>1,#</sup>, Vasciaveo A.<sup>2,#</sup>, Ochiai Y.<sup>1</sup>, Kim W.<sup>1</sup>, Middelhoff M.<sup>3</sup>, Nienhüser H.<sup>4</sup>, Belin B.<sup>1</sup>, LaBella J.<sup>1</sup>,  
3 Zamechek LB.<sup>1</sup>, Wong M.H.<sup>5</sup>, Li L.<sup>6</sup>, Guha C.<sup>7</sup>, Yan K.<sup>1</sup>, Califano A.<sup>2,8,9,10,11</sup>, and Wang T.C.<sup>1,11</sup>.

4

5 <sup>1</sup> Division of Digestive and Liver Diseases Medicine and Irving Cancer Research Center, Department of  
6 Medicine, Columbia University Medical Center, New York, NY 10032, USA.

7 <sup>2</sup> Department of Systems Biology, Columbia University, New York, NY 10032, USA.

8 <sup>3</sup> Klinik und Poliklinik für Innere Medizin II, Klinikum rechts der Isar, Technische Universität München,  
9 Munich, Germany.

10 <sup>4</sup> Department of General, Visceral and Transplant Surgery University Hospital Heidelberg Im  
11 Neuenheimer Feld 420 69120, Heidelberg, Germany.

12 <sup>5</sup> Department of Cell, Developmental & Cancer Biology, Oregon Health & Sciences University 3181 SW  
13 Sam Jackson Park Road, L215, Portland, USA.

14 <sup>6</sup> Stowers Institute for Medical Research, Kansas City, MO 64110, USA; Department of Pathology and  
15 Laboratory Medicine, University of Kansas Medical Center, Kansas City, KS 66107, USA.

16 <sup>7</sup> Department of Radiation Oncology, Albert Einstein Cancer Center, Albert Einstein College of  
17 Medicine, 1300 Morris Park Avenue, Bronx, NY 10461, USA.

18 <sup>8</sup> Department of Medicine, Vagelos College of Physicians and Surgeons, Columbia University Irving  
19 Medical Center, New York, NY 10032, USA.

20 <sup>9</sup> Department of Biochemistry & Molecular Biophysics, Vagelos College of Physicians and Surgeons,  
21 Columbia University Irving Medical Center, New York, NY 10032, USA.

22 <sup>10</sup> Department of Biomedical Informatics, Vagelos College of Physicians and Surgeons, Columbia  
23 University Irving Medical Center, New York, NY 10032, USA.

24 <sup>11</sup> Herbert Irving Comprehensive Cancer Center, Columbia University Irving Medical Center, New York,  
25 NY 10032, USA.

26 # These authors contributed equally

27

28 **Correspondence to:** A. Califano ([ac2248@cumc.columbia.edu](mailto:ac2248@cumc.columbia.edu)) and Timothy C. Wang  
29 ([tcw21@cumc.columbia.edu](mailto:tcw21@cumc.columbia.edu))

30

## 31 **Summary**

32 The currently accepted intestinal epithelial cell organization model equates crypt base columnar  
33 (CBC) cells, marked by high levels of *Lgr5* expression, with the intestinal stem cell (ISC)<sup>1</sup>.  
34 However, recent intestinal regeneration studies have uncovered limitations of the 'Lgr5-CBC'  
35 model<sup>2,3</sup>, leading to two major views: one favoring the presence of a quiescent reserve stem cell  
36 population<sup>4-7</sup>, the other calling for differentiated cell plasticity<sup>8-11</sup>. To test if an alternative model  
37 may help reconcile these perspectives, we studied the hierarchical organization of crypt epithelial  
38 cells in an unbiased fashion, by combining high-resolution, single-cell profiling and lineage tracing  
39 in multiple transgenic mouse models. These show that *Lgr5* is not a specific ISC marker; rather,  
40 cells located in the crypt isthmus, which include *Lgr5*<sup>low</sup> cells, comprise the ISCs that sustain tissue  
41 homeostasis. Following irradiation or intestinal injury, surviving ISCs and progenitors, but not  
42 differentiated cells, participate in intestinal regeneration, suggesting that neither de-differentiation  
43 nor reserve stem cell populations are drivers of intestinal regeneration. Our results provide a novel  
44 viewpoint for the intestinal crypt epithelium, in which ISCs localize to the crypt isthmus, and ISC  
45 potential is restricted to stem and progenitor cells.

46

## 47 **Introduction**

48 The intestinal epithelium is characterized by a high cellular turnover rate, making it an attractive  
49 model to study adult stem cell biology. The Intestinal Stem Cell (ISC) is defined by its ability to  
50 self-renew and to give rise to all intestinal epithelial lineages. Lineage tracing studies have  
51 uncovered a multitude of genes expressed in ISCs<sup>3-7,12,13</sup>; among others, *Lgr5* has been widely  
52 accepted as the primary ISC marker<sup>14</sup>, due to its proposed high degree of specificity. In particular,  
53 *Lgr5* was reported to be selectively expressed in crypt base columnar (CBC) cells, located at the  
54 very bottom of the intestinal crypts, between Paneth cells, typically at positions +1 to +3<sup>14</sup>.  
55 However, recent studies on intestinal regeneration following high doses of radiation<sup>3,7,14</sup>, with  
56 selective *Lgr5*-expressing cell ablation<sup>2</sup>, have shown that other crypt epithelial cells can  
57 compensate for the loss of *Lgr5*<sup>+</sup> cells. These observations suggest that the 'Lgr5-CBC' model  
58 may not effectively represent the regenerative ability of the intestinal epithelium. To account for  
59 these findings, two major hypotheses have emerged: the first proposing that, in addition to the  
60 *Lgr5*<sup>+</sup> ISCs, a quiescent '+4' stem cell population may act as a 'reserve' to replenish the ISC pool  
61 following intestinal injury<sup>2-4</sup>, the second asserting that, following ISC loss, multiple differentiated  
62 cell types may undergo de-differentiation and serve as *bona fide* ISCs<sup>8-11</sup>.

63 Single cell transcriptomic has emerged as a powerful tool to study tissue heterogeneity and to  
64 uncover the identity of rare cell populations<sup>15,16</sup>. With respect to the intestine, this approach has  
65 been instrumental in inventorying the specific differentiation states of diverse intestinal lineages,  
66 as well as to investigate the cellular composition of the regenerating intestine<sup>4,17-19</sup>. However,  
67 previous studies and descriptions of the intestinal epithelium hierarchical organization have relied  
68 heavily on established markers, thus forcing an interpretation compatible with prior ISC models<sup>1</sup>.

69 Recently, a number of studies have shown that computational cell potency inference is effective  
70 in reconstructing cell hierarchies within tissues<sup>20-23</sup>. These novel approaches can infer the  
71 hierarchical organization of intestinal epithelial cells *de novo*, in unbiased fashion, *i.e.*, without

72 having to rely on prior knowledge. Such an approach can thus help assess whether the current  
73 ISC models are consistent with actual tissue organization. Furthermore, these methodologies  
74 allow investigating putative changes in intestinal epithelial cell potency following intestinal injury,  
75 as well as the emergence of a reserve stem cell population.

76 To address these questions, we combined single cell profiling with novel lineage tracing mouse  
77 models to study intestinal crypt cells and then analyzed their hierarchical organization using an  
78 unbiased, data-driven approach that does not rely on established markers. We find that *Lgr5*  
79 overlaps with but is not uniquely expressed in stem and progenitor cells. Moreover, we provide  
80 evidence that the source of intestinal stemness responsible for homeostasis and regeneration lies  
81 within the isthmus compartment. Based on these results, we propose a novel model of intestinal  
82 organization in which many actively cycling cells in the crypt isthmus are uncommitted and include  
83 multipotent, self-renewing ISCs. Following intestinal injury, surviving isthmal stem cells guide  
84 intestinal regeneration, linking them to the postulated reserve ISCs, and suggesting that de-  
85 differentiation constitutes an exceptional event rather than a main regenerating intestine driver.

## 86 Results

87 ***An unbiased approach to elucidate the organization of intestinal crypt epithelial cells:*** To  
88 study intestinal crypt epithelial cell composition, we developed an integrative, experimental and  
89 computational pipeline designed to recover the transcriptional identity of individual intestinal cells,  
90 as well as their hierarchical relationships, by transcriptomic and epigenetic single cell profile  
91 analysis (Fig.1a). High enrichment of crypt epithelial cells was achieved via nearly complete villus  
92 epithelial cell exclusion, using a villi-cell specific antibody (B6A6<sup>24</sup>) (Extended Data Fig.1a).

93 To avoid critical gene dropout issues common to single cell RNA-seq (scRNA-seq) profile  
94 analyses—where, on average,  $\geq 80\%$  of the genes are undetectable in each individual cell<sup>25</sup>—we  
95 relied on an established network-based computational pipeline designed to measure the  
96 transcriptional activity regulatory and signaling proteins from scRNA-seq profiles, using the VIPER  
97 algorithm<sup>26</sup>. Specifically, VIPER measures a protein's activity based on the differential expression  
98 of its transcriptional targets (*regulon*), with the latter identified by the ARACNe algorithm<sup>27,28</sup>. This  
99 allows quantitative activity assessment of  $> 6,500$  proteins—including transcription factors, co-  
100 factors, signaling proteins, and surface markers—with virtually no dropouts. Critically, we have  
101 shown that this methodology allows identification of subpopulations that are essentially  
102 undetectable by gene expression analysis<sup>15,16</sup>, robust, highly reproducible quantification of protein  
103 activity, comparing favorably with antibody-based single cell measurements<sup>15</sup>, and optimal  
104 removal of technical artifacts and batch effects<sup>29</sup>.

105 To identify intestinal stem and progenitor cells, we combined analyses of crypt epithelial cell  
106 chromatin accessibility via single-cell Assay for Transposase-Accessible Chromatin  
107 scATAC-seq<sup>30</sup> and cell potency inference via scRNA-seq analysis<sup>20,22,23</sup> (See *methods*). Three  
108 major subpopulations emerged from protein activity-based cluster analyses of  $>3,500$  crypt  
109 epithelial cells, corresponding to two established intestinal lineages, secretory (*Hepacam2<sup>hi</sup>*,  
110 *Tff3<sup>hi</sup>*, etc.) and absorptive (*Ckmt1<sup>hi</sup>*, *Ccl25<sup>hi</sup>*, etc.) cells, with a third subpopulation mostly

111 comprised of stem and progenitor cells (*Stmn1<sup>hi</sup>*, *Dek<sup>hi</sup>*, etc.)<sup>1,17,19</sup> (Extended Data Fig.1b-e, Table  
112 3-4).

113 To uncover lineage-specific sub-populations, we performed independent, protein activity-based  
114 cluster analysis of each one of these three major subpopulations (Fig.1b-c, Extended Data Table  
115 5-6). Notably at the single cell level, the vast majority of population-specific proteins—including  
116 established intestinal lineage markers such as *Fev*<sup>31</sup>, and *Gfi1b*<sup>1</sup>—could be detected only by  
117 VIPER-based protein activity analysis but not based on the expression of their encoding genes  
118 (Extended Data Fig.2). The refined cluster analysis revealed two absorptive clusters,  
119 corresponding to subpopulations of early specified and more committed cells, respectively;  
120 moreover, it revealed three established secretory subpopulations, including Tuft (*Dclk1+*),  
121 Enteroendocrine (*NeuroD1+*), and Goblet (*Atoh1+*) cells<sup>1</sup>, with *Lyz1<sup>hi</sup>* Paneth cells found mainly  
122 within the Goblet cluster, possibly due to low representation in this dataset (Extended Data  
123 Fig.3a). Finally, stem and progenitor cells segregated into two clusters corresponding to  
124 subpopulations that, intriguingly, presented similar levels of inferred potency, suggesting that this  
125 subdivision does not reflect a hierarchical partition of these cells (Fig.1d, Extended Data Fig.3b).  
126 Rather, the highest level of stemness potential was detected at the boundary between these two  
127 (Fig.1d), suggesting that these two clusters reflect a gradual yet progressive differentiation of  
128 progenitor cells towards a secretory (Sec-Progenitor) or absorptive (Abs-Progenitor) fate,  
129 respectively.

130 Although the presence of a postulated rare ISC subpopulation remains elusive<sup>32</sup>, these analyses  
131 provide a unique opportunity to study the molecular features that best describe the ISC  
132 compartment, as defined by the highest cell potency level. To this aim, we characterized the  
133 regulatory factors that best associate with cell potency by correlating the activity profiles of  
134 regulatory proteins, as assessed by VIPER, with CytoTRACE-based analysis<sup>20</sup> of individual cells  
135 (Fig.1e, Extended Data Fig.4, Table 7). Regulatory proteins, whose activity presented the most

136 significant correlation with CytoTRACE scores were highly enriched for factors known to regulate  
137 stemness across different tissues, including the intestine<sup>33-39</sup>. Consistently, known regulators of  
138 intestinal differentiation<sup>1</sup> had negative correlation scores.

139 Among others, the transcription factor Yy1, was previously reported to play an essential role in  
140 preventing ISC differentiation and to impair epithelial cells organoids forming capacities upon  
141 genetic knock-out<sup>37</sup>. Several chromatin remodeler enzymes also emerged from the analysis—  
142 including Smarca5<sup>34</sup> and Atad2<sup>35</sup>, which have been previously associated with stemness—thus  
143 highlighting the crucial role of chromatin remodeling in cell potency. Interestingly, several splicing  
144 factors also emerged within the broad group of transcriptional regulators associated with cell  
145 potency, including members of the Srsf family, which were recently shown to play an important  
146 role in regulating the intestinal epithelium<sup>38</sup>.

147 Focusing on genes, whose differential expression correlated with inferred cell potency (Extended  
148 Data Table 8), we identified *Smarca5*, *Stmn1* and *Dek*, all representing previously proposed  
149 markers of adult stem cells<sup>33,40</sup>. *Birc5a*<sup>41</sup> and *Ncl*<sup>42</sup>, both described as highly expressed in  
150 embryonic stem cells, also emerged among the most correlated genes. Finally, *Fgfbp1*, which is  
151 expressed in cells capable to lineage trace the intestine (*Personal communication*), was also  
152 positively correlated with inferred cell potency.

153 These analyses provide the first unbiased characterization of intestinal crypt epithelial cells using  
154 mechanism-based dissection of protein activity in single-cell data, via regulatory network analysis.  
155 Moreover, they provide novel insights on the factors that implement and maintain the  
156 transcriptional state of individual intestinal populations, via their regulatory targets, and highlight  
157 those that best recapitulate intestinal cell potency.

158 ***Lgr5 expression is not restricted to intestinal stem and progenitor cells:*** *Lgr5* has been  
159 described as a highly specific ISC marker<sup>14</sup>. Based on *Lgr5* reporter allele and CreER lineage

160 tracing assays, *Lgr5*<sup>+</sup> cells were postulated to correspond to crypt base columnar (CBC) cells in  
161 the +1 to +3 region<sup>14</sup>. Surprisingly, however, our analyses did not reveal a statistically significant  
162 correlation between *Lgr5* expression and inferred cell potency (Extended Data Fig.5a).  
163 Specifically, cells presenting the highest *Lgr5* expression levels were not associated with the  
164 highest stemness potential, as assessed from CytoTRACE analysis; rather, the highest potency  
165 was detected in some *Lgr5*<sup>low</sup> cells (Fig.2a). Importantly, similar considerations could be drawn  
166 for other genes previously proposed as ISC-specific markers (Extended Data Fig.5b-c)<sup>5-7,12,13</sup>.

167 To better characterize the *Lgr5* expression pattern, we generated additional scRNA-seq profiles  
168 from highly purified crypt epithelial cells, harvested from an *Lgr5*<sup>DTR-eGFP</sup> mouse<sup>2</sup> (Fig.2b). By  
169 mapping the *DTR-eGFP* allele on sequencing data, we were able to study expression profiles of  
170 both Wild type (Wt) and Transgenic (Tg) *Lgr5* alleles in purified crypt epithelial cells (Fig.2c).  
171 Quantification of the number of cells expressing Wt or Tg alleles revealed virtually complete  
172 overlap, confirming that nearly all *Lgr5* expressing cells were also positive for *DTR-eGFP* (Fig.2c).  
173 Intriguingly, *Lgr5* expression was detected in about 20% of all sequenced crypt cells in our  
174 datasets (20.495±1.8, % of total), suggesting a much broader domain of expression than  
175 previously appreciated<sup>14</sup>. Flow cytometry analysis of the crypt epithelium consistently revealed an  
176 average of 20% *Lgr5*<sup>eGFP+</sup> cells (19.96±3.96 % of Epcam<sup>+</sup> cells), thus confirming the faithful activity  
177 of the reporter allele, which was not confined to the CBC population (Fig.2d).

178 We next analyzed the identity of *Lgr5* expressing cells within our datasets. Most of *Lgr5*<sup>hi</sup> cells  
179 were detected in the Sec-Progenitor-1 subpopulation (Fig. 2e), which we annotated as secretory-  
180 biased progenitors. Interestingly, previous studies have observed direct specification of secretory  
181 cells from *Lgr5*<sup>+</sup> ones<sup>1,18</sup>. In line with these observations, we detected a small fraction of *Lgr5*  
182 expressing cells that were also positive for known secretory markers, such as *Atoh1* and *Dll1*  
183 (Extended Data Fig.5d). Analysis of a published dataset<sup>43</sup> confirmed expression of multiple  
184 secretory-associated genes in *Lgr5*<sup>eGFP+</sup> sorted cells (Extended Data Fig.5e).



185 Surprisingly, we also observed high levels of *Lgr5* expression in differentiated Tuft cells, marked  
186 by *Dclk1* expression (Fig.2e, Extended Data Fig.5e)<sup>1,44</sup>. *Dclk1* staining validated its overlap with  
187 *Lgr5*<sup>eGFP+</sup> cells, both within the crypt as well as the villi region (39.2±9.5 % of *Dclk1*<sup>+</sup> cells; Fig.2f,  
188 Extended Data Fig.6a). Moreover, sorted *Dclk1*<sup>ZsGreen+</sup> cells<sup>45</sup> confirmed expression of *Lgr5* and  
189 *Ascl2*<sup>46</sup>, both proposed ISC markers, in differentiated Tuft cells (Extended Data Fig.6b-d). Taken  
190 together, these data show that *Lgr5* expression is not restricted to intestinal stem and progenitor  
191 cells but also spans differentiated subpopulations, including Tuft cells. Furthermore, they suggest  
192 that among *Lgr5* expressing cells, only a subset of *Lgr5*<sup>low</sup> cells are characterized by high levels  
193 of inferred stemness.

194 ***Isthmal stem cells sustain intestinal tissue homeostasis:*** *Lgr5*<sup>eGFP-CreERT</sup> mice show clear  
195 labelling of a subset of crypt epithelial cells exhibiting long term lineage tracing (ISCs)<sup>14</sup>.  
196 Accordingly, this mouse line was initially reported to almost uniquely label CBC cells, marked by  
197 high levels of *Lgr5* expression<sup>14</sup>. However, our analysis suggests that only a fraction of *Lgr5*<sup>low</sup> -  
198 expressing cells is characterized by high cell potency (Fig.2a). We therefore investigated whether  
199 the *Lgr5*<sup>eGFP-CreERT</sup> mouse could label cells other than the *Lgr5*<sup>Hi</sup> CBC population. Staining for eGFP  
200 and Cre recombinase revealed a similar distribution along the crypt epithelium, suggesting  
201 functional expression of the Tg allele above the crypt base in the isthmus region, where *Lgr5*<sup>low</sup>  
202 cells are located (Fig.2d, Fig.3a). In line with this observation, following Tamoxifen (TAM)  
203 induction, scattered tdTomato<sup>+</sup> cells could be consistently observed around the +4/+6 isthmus  
204 region (Fig.3b Extended Data Fig.7a), raising the possibility that long term lineage tracing may  
205 originate from *Lgr5*<sup>low</sup> cells located at the crypt isthmus.

206 To investigate the contribution of CBC cells versus isthmus cells to long term lineage tracing, we  
207 studied the labelling of *Troy*<sup>CreERT</sup> mice, as *Troy* has been described as an additional CBC specific  
208 marker<sup>47</sup>. Following TAM induction, tdTomato<sup>+</sup> cells could be found near the crypt base, but again  
209 were not confined to the CBC population (Fig.3c, Extended Data Fig.7a). Comparison of position-

210 based labelling revealed a greater number of non-CBC (+4 or higher) tdTomato<sup>+</sup> cells in Troy<sup>CreERT</sup>  
211 mice relative to Lgr5<sup>eGFP-CreERT</sup> (Fig.3d). Over time Troy<sup>CreERT</sup> labelled cells traced significantly  
212 more than Lgr5<sup>eGFP-CreERT</sup> labelled cells (66.28%±14.75% vs 37.05%±8.37% at 6 months) (Fig.3e-  
213 f). Importantly, at day 1, both mouse models had a similar number of initially labelled cells (fraction  
214 of tdTomato<sup>+</sup>: Lgr5<sup>eGFP-CreERT</sup> 7.94%±1.58% vs Troy<sup>CreERT</sup> 8.23%±2.82% at day 1) (Fig.3f),  
215 suggesting that cells higher up in the crypt, which were over-represented in Troy<sup>CreERT</sup> mice, were  
216 largely responsible for long term lineage tracing.

217 Located immediately above the crypt base, in the crypt isthmus, there is a domain of highly  
218 proliferating cells, often referred to as transit amplifying (TA) progenitors<sup>14</sup>. Since our analyses  
219 suggest that ISCs are actively cycling (Extended Data Fig.7b) and staining for proliferative  
220 markers showed that a significant fraction of +4/+6 *Troy* expressing cells were indeed proliferating  
221 (Extended Data Fig.7c), we decided to test whether ISCs may localize to the crypt isthmus. For  
222 this purpose, we studied the contribution of proliferating cells, which are more abundant in this  
223 compartment, to long term lineage tracing using a novel mouse model (Lgr4<sup>CreERT</sup>) that targets  
224 inducible Cre to *Lgr4* expressing cells (Extended Data Fig.7d), previously reported to mainly  
225 comprise intestinal progenitors<sup>48</sup>. Consistent with our expectation, following TAM induction, a  
226 majority of labelled cells were actively cycling (Extended Data Fig.7e) and localized to the +4/+10  
227 position within the crypt (Fig.3g, Extended Data Fig.7f). Similarly, analysis of the Ki67<sup>CreERT</sup> mouse  
228 model<sup>49</sup> confirmed efficient labelling of cycling cells in the isthmus region with little overlap (≤10%  
229 labelled cells at +1/+3 in both mouse models) with CBC cells (Fig.3g, Extended Data Fig.7f). Over  
230 time, both models gave rise to tracing ribbons, which persisted for up to six months, thus  
231 demonstrating labelling of some ISCs (Fig.3h-i).

232 Based on these results, we reasoned that the subset of *Lgr5* expressing cells that were also  
233 labelled in Lgr4<sup>CreERT</sup> and Ki67<sup>CreERT</sup> mice would be enriched for ISCs. Therefore, we analyzed  
234 their specific overlap by crossing the Lgr4<sup>CreERT</sup> and Ki67<sup>CreERT</sup> mice to the Lgr5<sup>DTR-eGFP</sup> reporter

235 allele<sup>2</sup>. Many double positive cells could be observed above the CBC region, in the crypt isthmus,  
236 and qPCR analyses confirmed enrichment for *Lgr5*<sup>low</sup> expressing cells in the double positive  
237 population (Extended Data Fig.7g-h). In line with these observations, analysis of histological  
238 sections revealed that some tracing ribbons originated at the level of the crypt isthmus, from +4/+6  
239 positions, and persisted for a month or more in the absence of CBC labelling (Fig.3j, Extended  
240 Data Fig.7i). At 6 months post TAM induction, most units appeared either fully labelled or negative  
241 except for the occasional exclusive presence of Paneth cells (Fig.3h), in line with previous  
242 proposed dynamics of crypt clonality<sup>50,51</sup>. Taken together, these results support the hypothesis  
243 that ISCs are located within the isthmus compartment and tend to express low levels of *Lgr5*  
244 (Fig.3k). Taken together, such observations, which are fully consistent with our computational  
245 analyses, offer a new perspective on intestinal epithelial cells hierarchical organization.

246 ***Lgr5*<sup>neg</sup> isthmal cells compensate for loss of *Lgr5* expressing cells:** Our data suggest that  
247 active cycling isthmus cells, some expressing low levels of *Lgr5*, comprise the ISCs responsible  
248 for maintaining long term tissue homeostasis. This is consistent with multiple studies showing that  
249 selective ablation of *Lgr5* expressing cells does not impact normal tissue turnover. In particular,  
250 two models of interpretation have been proposed to explain such observations, whereby *Lgr5*<sup>+</sup>  
251 cells repopulation is driven by either (a) de-differentiation of terminally differentiated cells<sup>8-11</sup>, or  
252 (b) activation of a reserve quiescent ISC<sup>2,4</sup>.

253 To clarify the dynamics of this process we analyzed the Diphtheria Toxin (DT) ablation model  
254 using the *Lgr5*<sup>DTReGFP</sup> mouse line<sup>2</sup>. Flow cytometry analysis confirmed consistent, complete  
255 elimination of *Lgr5*<sup>DTReGFP+</sup> cells after two doses of DT without compromising the intestinal  
256 mucosa; this was followed by the later reappearance of *Lgr5* expressing cells, returning to control  
257 values within 10 days (Fig.4a, Extended Data Fig.8a). Of note, the disappearance of *Lgr5*<sup>+</sup> cells  
258 coincided with a marked reduction of *Dclk1*<sup>+</sup> Tuft cells (Extended Data Fig.8a), corroborating their  
259 expression of *Lgr5* and aligning well with previous reports<sup>52</sup>.

260 To gain additional insights into the response to *Lgr5*<sup>+</sup> cell ablation, we profiled the transcriptome  
261 of purified crypt epithelial cells at 24h after two doses of DT; this represents a time point when  
262 most *Lgr5*<sup>+</sup> cells are ablated (% of *Lgr5*-eGFP<sup>+</sup> cells: 0.44±0.85 vs 20.52±1.94 - Fig.4b) and  
263 regeneration has begun. ScRNA-seq profile analysis revealed that the overall cellular composition  
264 was intact, despite a marked reduction in *Lgr5* expressing cells (Fig.4c, Extended Data Fig.8c),  
265 consistent with the observation that *Lgr5*<sup>+</sup> cells are largely dispensable for crypt epithelium  
266 regeneration<sup>2</sup>. Importantly, these analyses did not show expansion of novel cell populations that  
267 may be ascribed to activation of a reserve ISC. Joint CytoTRACE analysis of CTRL and DT-  
268 treated samples revealed dramatic reduction of high potency cells, in the top decile of high  
269 potency scored cells, following DT treatment (Fig. 4d), corroborating the notion that *Lgr5* is  
270 expressed in some stem and progenitor cells. Nevertheless, a consistent fraction of high inferred  
271 stemness cells persisted at this time point, suggesting that some *Lgr5*<sup>neg</sup> cells may possess the  
272 potential to serve as ISCs to support tissue homeostasis.

273 Similar to control, following DT treatment, high cell potency was confined to stem and progenitors,  
274 suggesting that ISC potential is restricted to these populations. To test this hypothesis, we first  
275 analyzed the behavior of *Lgr4*<sup>CreERT</sup> labelled cells following DT treatment. TdTomato<sup>+</sup>*Lgr5*<sup>DTReGFP-</sup>  
276 cells could be observed scattered across the crypt epithelium and expanded over time giving rise  
277 to new TdTomato<sup>+</sup>*Lgr5*<sup>DTReGFP+</sup> cells at day 10 (Fig.4e, Extended Data Fig.8d). Next, we tested  
278 whether differentiated cells may also participate in *Lgr5*<sup>+</sup> cell repopulation alongside isthmal  
279 proliferating cells, thus reflecting the proposed broad plasticity of intestinal epithelial cells<sup>11</sup>. For  
280 this purpose, we generated a novel mouse model that targeted inducible Cre to *Dll1*-expressing  
281 cells (*Dll1*<sup>CreERT</sup>, Extended Data Fig.9a). *Dll1*<sup>CreERT</sup> mice efficiently label committed secretory cells  
282 that overlap only minimally with proliferative progenitors and show limited organoid forming  
283 capacity (Extended Data Fig.9b-d). Upon DT treatment, *Dll1*<sup>CreERT</sup> labelled cells did not expand,  
284 rather labelled cells appeared as Paneth cells at day 10, suggesting that differentiated secretory

285 cells do not contribute to  $Lgr5^+$  cell repopulation (Fig.4f, Extended Data Fig.9e). A possible  
286 explanation for the discrepancy with previous reports<sup>8,10</sup> could be attributed to the higher  
287 specificity of our newly generated mouse line relative to the previously reported  $Dll1^{eGFP/CreERT}$ ,  
288 which shows lineage tracing events also in homeostatic conditions<sup>8</sup>. Indeed,  $Dll1^{low}$  cell can be  
289 detected broadly within the stem/progenitor compartment, including with some  $Lgr5^{low}$  cells  
290 (Extended Data Fig.5d). Taken together, these data show that, upon loss of  $Lgr5$  expressing cells,  
291 isthmal  $Lgr5^{neg}$  cells have the capacity to act as ISCs and to support tissue turnover. Furthermore,  
292 they show that regenerative potential is restricted to stem and progenitor cells and that de-  
293 differentiation or activation of a reserve quiescent-ISC are not the source of  $Lgr5^+$  cell repopulation  
294 in this model (Fig.4g).

295 ***Surviving isthmal stem cells regenerate the intestinal epithelium following IR damage:*** As  
296 discussed, analysis of CTRL and DT-ablated crypt epithelial cells revealed neither the presence  
297 of a putative reserve ISC population nor any sign of active de-differentiation. Rather, it supports  
298 a model where some  $Lgr5^{neg}$  isthmal cells retain ISC potential and sustain intestinal tissue  
299 turnover. To determine whether this may be restricted to the ablation model in which only  $Lgr5$ -  
300 expressing cells are perturbed, we assessed whether intestinal regeneration after lethal irradiation  
301 (IR) follows similar cellular dynamics. Damage due to high dose IR exposure can induce  
302 gastrointestinal syndrome, with highly proliferative cells and  $Lgr5^+$  CBCs representing  
303 subpopulations more likely to be susceptible to irreversible IR damage<sup>14</sup>.

304 To pinpoint the identity of cells with regenerative potential, we studied crypt epithelial cell  
305 composition after exposure to 12 Gy whole body IR (WBI), by scRNA-seq analysis. First, to  
306 identify the earliest stage of intestinal regeneration, we characterized the dynamics of intestinal  
307 proliferation following IR damage (Extended Data Fig.10a). We postulated that at this time point,  
308 regenerating stem cells would be undertaking their first or second round of cell divisions, marked

309 by an increase in Ki67 labeling. We identified 60 hours post IR as the earliest time point when  
310 proliferation increases, reflecting the first regenerative wave and the focal point for our analysis.

311 Following IR damage, surviving cells aligned well with previously identified clusters and no novel  
312 subpopulations emerged (Fig.5b). As expected<sup>14</sup>, proliferative progenitors as well as *Lgr5*  
313 expressing cells were largely depleted at this time point (Extended Data Fig.10b). Similar to the  
314 ablation model, surviving differentiated cells retained low levels of inferred cell potency (Extended  
315 Data Fig.10c), and evaluation of *Dll1*<sup>CreERT</sup> lineage tracing corroborated the absence of *Dll1*<sup>+</sup>  
316 secretory cell participation in intestinal regeneration (Extended Data Fig.10d).

317 In line with our hypothesis, we observed a small fraction of surviving cells characterized by high  
318 levels of inferred cell potency and expression of proliferative markers (Fig.5c), making them the  
319 most suitable candidates for the regenerating ISCs. Intriguingly, regenerating and homeostatic  
320 ISCs had a high degree of overlap (Extended Data Fig.10e), suggesting that those cells may  
321 correspond to surviving ISCs or early progenitors. To clarify the nature of these cells, we lineage  
322 traced intestinal isthmal cells following high doses of IR. Sixty hours after IR exposure, surviving  
323 tdTomato<sup>+</sup> cells (*Lgr4*<sup>CreERT</sup>) could be observed within the damaged epithelium (Fig.5D, Extended  
324 Data Fig.10f), thereby demonstrating that not all proliferative cells are lost following IR damage.  
325 Moreover, Ki67 staining (Fig.5d) and lineage tracing analysis at 5 days post IR (Fig.5e) confirmed  
326 active participation of surviving tdTomato<sup>+</sup> cells in intestinal regeneration.

327 We next sought to study the regulatory programs that characterize regenerating ISC. For this  
328 purpose we searched for features unique to cells with highest inferred cell potency pre- and post-  
329 IR (Fig.5f-g, Extended Data Fig.11a, Table 9-10). Pathway analysis showed that regenerating  
330 ISCs activate cell cycle damage checkpoints and upregulate multiple damage response factors<sup>53-</sup>  
331 <sup>55</sup>, reflecting the extended damage generated by IR exposure. This was further corroborated by  
332 analysis of the regulatory proteins that define the regenerating ISC compartment (Fig.5g). Apex1

333 and *Baz1a*, both known to be involved in DNA damage response<sup>56,57</sup>, were among the most  
334 statistically significant activated proteins. Moreover, regenerating ISCs expressed high levels of  
335 *Ly6a* (*Sca1*), as well as *Areg* and other proposed intestinal regeneration markers<sup>58</sup> (Fig.5f).  
336 Interestingly, we observed upregulation of *Clu* (Fig.5f, Extended Data Fig.11b), whose expression  
337 has been proposed as specific to a quiescent radio-resistant stem cell population (revival ISC<sup>4</sup>).  
338 These results raise the possibility that regenerating ISCs may represent an expanding reserve  
339 stem cell subpopulation. To clarify the nature of these cells, we analyzed *Clu* expression in traced  
340 intestinal proliferating cells (*Ki67<sup>CreERT</sup>*) pre- and post- IR damage. Results showed *Clu*  
341 upregulation in surviving tdTomato+ cells sixty hours post IR exposure (Extended Data Fig.11c),  
342 providing evidence that following IR damage, the ‘revival’ ISC correspond to surviving cycling  
343 cells rather than a separate quiescent stem cell population. Lastly, although we were unable to  
344 discriminate the relative contribution of pre-existing isthmal stem cells or early progenitors, our  
345 analyses strongly suggest that the potency to serve as regenerating ISCs is restricted to these  
346 populations (Fig.5h).

## 347 **Discussion**

348 Here we provide an unbiased characterization of intestinal crypt epithelial cells in homeostasis  
349 and regeneration. We find that ISCs are located in the isthmus, the crypt region previously thought  
350 to accommodate only TA progenitors. Furthermore, we provide evidence that intestinal  
351 regeneration arises from surviving stem and progenitor cells.

352 Our optimized isolation protocol—using the B6A6 Ab<sup>24</sup> to exclude villi cells—ensured high  
353 enrichment of the crypt epithelium and reproducibility across all high-throughput datasets,  
354 especially for the injured intestine where loss of tissue integrity greatly affect the isolation strategy.  
355 Furthermore, our computational pipeline integrated multiple algorithms to unbiasedly recover cell  
356 identities and study their hierarchical organization based on single cell transcriptomic and

357 epigenetic profiles. Compared to previous studies, the results obtained show a high degree of  
358 similarity<sup>17,18</sup> yet provide improved molecular resolution on intestinal stem and progenitor cells.  
359 Moreover, the proposed regulatory network-based classification schema offers novel insights on  
360 the mechanistic determinants of intestinal epithelial cell subpopulations. Intriguingly, many of the  
361 identified factors align well with previous reports<sup>1</sup>, thus further confirming their findings and  
362 suggesting that such signatures may be useful to study the role of novel factors in defining specific  
363 intestinal lineages.

364 Surprisingly, however, *Lgr5* expression did not correlate with inferred cell potency. *Lgr5*<sup>hi</sup> cells  
365 were largely found in the clusters associated with secretory progenitor cells as previously  
366 suggested for some intestinal *Lgr5*<sup>+</sup> cells<sup>18,59</sup> and similar to the stomach, where high levels of  
367 *Lgr5* can be detected in differentiated chief<sup>60</sup> and antral basal secretory cells<sup>61</sup>. In addition, we  
368 find that *Lgr5* expression is not restricted to stem or progenitor cells but can also be detected in  
369 differentiated Tuft and other secretory cells<sup>18</sup>. In sharp contrast, some *Lgr5*<sup>low</sup> cells were  
370 characterized as high potency cells and lineage tracing studies in multiple mouse models  
371 narrowed ISC localization to the crypt isthmus, where *Lgr5*<sup>low</sup> cells are present. While the inducible  
372 Cre drivers (*Lgr4*, *Ki67*) may occasionally label cells at the crypt base, tracing ribbons, which  
373 persisted independent of crypt base labelling, could be detected starting at the level of the  
374 isthmus. Furthermore, flow-cytometry analyses revealed the highest tracing efficiency in  
375 *Troy*<sup>CreERT</sup> mice that best labeled the isthmus crypt compartment, reflecting a greater labelling of  
376 ISC. Importantly, these observations resonate well with our and others previous reports<sup>3,5,7,12</sup> and  
377 highlight similarities with the gastric mucosa where stem cells localize in the isthmus region<sup>62</sup>.

378 Cells with the highest cell potency were detected at the boundary between the progenitor clusters  
379 (Sec-Progenitor and Abs-Progenitor). Notably, the difficulty in segregating ISC from early  
380 progenitors suggest their high-degree of similarity and may indicate they co-exist in closely  
381 comparable cellular states. Analysis of the factors that best associate with inferred cell potency



382 revealed multiple chromatin remodelers, including *Atad2*, which has been recently shown to  
383 determine cell potency in the skin<sup>35</sup>, as well as other factors previously suggested to regulate  
384 intestinal stemness<sup>37,38</sup>. Similarly, to *Lgr5*, other proposed markers for ISC, such as *Ascl2*<sup>63</sup>, also  
385 failed to correlate with inferred cell potency and were rather broadly expressed within the  
386 secretory lineage.

387 In addition to characterizing homeostatic crypt cell composition at steady state, we also analyzed  
388 intestinal regeneration following *Lgr5*<sup>+</sup> cell ablation and IR damage. In line with previous  
389 observations<sup>2,4</sup>, both models mostly eliminated *Lgr5* expressing cells, without evoking major  
390 composition changes within the intestine, at least for the DT ablation model. Notably, our results  
391 indicate that cells with high inferred cell potency persist within the intestine and align well with the  
392 proposed homeostatic ISC compartment. Furthermore, they highlight that differentiated cell types  
393 retain low cell potency states in both injury models and do not appear to acquire features of  
394 stemness. In fact, differentiated secretory cells, marked by high levels of *Dll1* expression, do not  
395 participate in intestinal regeneration, whereas surviving isthmal cells do. While the mouse models  
396 studied do not allow for the discrimination of the relative contribution between surviving ISC or  
397 early progenitors, they provide evidence that the potential to regenerate is restricted to these  
398 populations. In addition, when we analyzed the changes in the transcriptional profile of ISCs  
399 following IR damage, we detected a specific signature of regenerating cells<sup>58</sup>. This included  
400 upregulation of *Ly6a* (*Sca-1*) and *Areg* for example, and was accompanied by increased activation  
401 of several damage response factors, such as *Baz1a* and *Apex1*<sup>56-58,64</sup>. Intriguingly, we noted  
402 upregulation of *Clu*, an additional target of YAP signaling<sup>65</sup>, indicating that previously proposed  
403 ‘revival’ stem cells<sup>4</sup> correspond to surviving ISC and early progenitors rather than a distinct  
404 quiescent stem cell population.

405 In summary, our unbiased analysis suggests a new regulatory model where a subpopulation of  
406 isthmal stem cells sustains the intestine under conditions of both homeostasis and regeneration.

407 Previous findings suggesting the presence of a reserve stem cell or extensive cellular plasticity  
408 likely reflected overlap of inducible Cre driver with this isthmal population. Our finding of broad  
409 expression by intestinal progenitors of multiple genes used for lineage tracing can help reconcile  
410 previous reports<sup>8,9</sup>. Lineage allocation to either an absorptive or secretory fate occurs early on,  
411 resulting in bidirectional migration of cells from the isthmal ISC. Future studies will need to focus  
412 on the regulation of these early events and the key niche signals which maintain stem cell renewal  
413 within the intestinal isthmus.

414 **Author contribution:** EM, AV, AC, TCW conceived, designed the study and wrote the  
415 manuscript. EM performed most of the experiments. AV performed the computational analyses.  
416 YO performed *in vitro* experiments. WK generated and characterized Dll1 transgenic mice. MM,  
417 HN, BB, JL, LBZ participated in performing the experiments. MHW provided the B6A6 antibody.  
418 LL provided critical conceptual input and manuscript revisions. KY and CG participated in the  
419 discussion. TCW secured the funding.

420 **Acknowledgments:** This research was funded in part through the NIH/NCI Cancer Center  
421 Support Grant P30CA013696 and used the resources of the Herbert Irving Comprehensive  
422 Cancer Center Flow Cytometry Shard Resources, Molecular Pathology/MPSR, Genomics and  
423 High Throughput Screening, as well as the Genetically Modified Mouse Model Shared Resource  
424 (GMMMSR). This work was supported by grants from the NIH/NCI including UO1DK103155,  
425 R35CA210088, RO1NK128195 to TCW; as well as a NCI Outstanding Investigator Award (R35  
426 CA197745) and two NIH Shared Instrumentation Grants (S10 OD012351 and S1 0OD021764),  
427 all to AC. AV is supported by a U.S. Department of Defense Early Investigator Research Award  
428 (W81XWH19-1-0337) and an Early Career Development Pilot Award NIH/NCI Cancer Center,  
429 funded through the Cancer Center Support grant, P30CA013696. We thank Vladimir Korinek for  
430 the generous gift of the Troy<sup>CreERT</sup> mice. We are grateful for the support we received by Columbia  
431 University shared resources and we would like to thank Sun Dajiang “Kevin” (Molecular

432 Pathology/MPSR), Kissner, Michael (Columbia Stem Cell Initiative Flow Cytometry core facility),  
433 Erin Bush (Genomics and High Throughput Screening), and Lin Chyuan-Sheng “Victor”  
434 (Genetically Modified Mouse Model), for their incredible expertise and help in this project.

435 **Conflict of interest:** Dr. Califano is founder, equity holder, and consultant of DarwinHealth Inc.,  
436 a company that has licensed some of the algorithms used in this manuscript from Columbia  
437 University. Columbia University is also an equity holder in DarwinHealth Inc. US patent number  
438 10,790,040 has been awarded related to this work, and has been assigned to Columbia University  
439 with Dr. Califano as an inventor.

## 440 References

- 441 1 Beumer, J. & Clevers, H. Cell fate specification and differentiation in the adult mammalian  
442 intestine. *Nat Rev Mol Cell Biol* **22**, 39-53, doi:10.1038/s41580-020-0278-0 (2021).
- 443 2 Tian, H. *et al.* A reserve stem cell population in small intestine renders Lgr5-positive cells  
444 dispensable. *Nature* **478**, 255-259, doi:10.1038/nature10408 (2011).
- 445 3 Asfaha, S. *et al.* Krt19(+)/Lgr5(-) Cells Are Radioresistant Cancer-Initiating Stem Cells in the Colon  
446 and Intestine. *Cell Stem Cell* **16**, 627-638, doi:10.1016/j.stem.2015.04.013 (2015).
- 447 4 Ayyaz, A. *et al.* Single-cell transcriptomes of the regenerating intestine reveal a revival stem cell.  
448 *Nature* **569**, 121-125, doi:10.1038/s41586-019-1154-y (2019).
- 449 5 Powell, A. E. *et al.* The pan-ErbB negative regulator Lrig1 is an intestinal stem cell marker that  
450 functions as a tumor suppressor. *Cell* **149**, 146-158, doi:10.1016/j.cell.2012.02.042 (2012).
- 451 6 Montgomery, R. K. *et al.* Mouse telomerase reverse transcriptase (mTert) expression marks slowly  
452 cycling intestinal stem cells. *Proc Natl Acad Sci U S A* **108**, 179-184, doi:10.1073/pnas.1013004108  
453 (2011).
- 454 7 Sheng, X. *et al.* Cycling Stem Cells Are Radioresistant and Regenerate the Intestine. *Cell Rep* **32**,  
455 107952, doi:10.1016/j.celrep.2020.107952 (2020).
- 456 8 van Es, J. H. *et al.* Dll1+ secretory progenitor cells revert to stem cells upon crypt damage. *Nat Cell*  
457 *Biol* **14**, 1099-1104, doi:10.1038/ncb2581 (2012).
- 458 9 Tetteh, P. W. *et al.* Replacement of Lost Lgr5-Positive Stem Cells through Plasticity of Their  
459 Enterocyte-Lineage Daughters. *Cell Stem Cell* **18**, 203-213, doi:10.1016/j.stem.2016.01.001  
460 (2016).
- 461 10 Murata, K. *et al.* Ascl2-Dependent Cell Dedifferentiation Drives Regeneration of Ablated Intestinal  
462 Stem Cells. *Cell Stem Cell* **26**, 377-390 e376, doi:10.1016/j.stem.2019.12.011 (2020).
- 463 11 Shivdasani, R. A., Clevers, H. & de Sauvage, F. J. Tissue regeneration: Reserve or reverse? *Science*  
464 **371**, 784-786, doi:10.1126/science.abb6848 (2021).
- 465 12 Sangiorgi, E. & Capecchi, M. R. Bmi1 is expressed in vivo in intestinal stem cells. *Nat Genet* **40**,  
466 915-920, doi:10.1038/ng.165 (2008).
- 467 13 Takeda, N. *et al.* Interconversion between intestinal stem cell populations in distinct niches.  
468 *Science* **334**, 1420-1424, doi:10.1126/science.1213214 (2011).
- 469 14 Barker, N. *et al.* Identification of stem cells in small intestine and colon by marker gene Lgr5.  
470 *Nature* **449**, 1003-1007, doi:10.1038/nature06196 (2007).
- 471 15 Obradovic, A. *et al.* Single-cell protein activity analysis identifies recurrence-associated renal  
472 tumor macrophages. *Cell* **184**, 2988-3005 e2916, doi:10.1016/j.cell.2021.04.038 (2021).
- 473 16 Elyada, E. *et al.* Cross-Species Single-Cell Analysis of Pancreatic Ductal Adenocarcinoma Reveals  
474 Antigen-Presenting Cancer-Associated Fibroblasts. *Cancer Discov* **9**, 1102-1123,  
475 doi:10.1158/2159-8290.CD-19-0094 (2019).
- 476 17 Haber, A. L. *et al.* A single-cell survey of the small intestinal epithelium. *Nature* **551**, 333-339,  
477 doi:10.1038/nature24489 (2017).
- 478 18 Bottcher, A. *et al.* Non-canonical Wnt/PCP signalling regulates intestinal stem cell lineage priming  
479 towards enteroendocrine and Paneth cell fates. *Nat Cell Biol* **23**, 23-31, doi:10.1038/s41556-020-  
480 00617-2 (2021).
- 481 19 Moor, A. E. *et al.* Spatial Reconstruction of Single Enterocytes Uncovers Broad Zonation along the  
482 Intestinal Villus Axis. *Cell* **175**, 1156-1167 e1115, doi:10.1016/j.cell.2018.08.063 (2018).
- 483 20 Gulati, G. S. *et al.* Single-cell transcriptional diversity is a hallmark of developmental potential.  
484 *Science* **367**, 405-411, doi:10.1126/science.aax0249 (2020).

- 485 21 Teschendorff, A. E. & Enver, T. Single-cell entropy for accurate estimation of differentiation  
486 potency from a cell's transcriptome. *Nat Commun* **8**, 15599, doi:10.1038/ncomms15599 (2017).
- 487 22 Guo, M., Bao, E. L., Wagner, M., Whitsett, J. A. & Xu, Y. SLICE: determining cell differentiation and  
488 lineage based on single cell entropy. *Nucleic Acids Res* **45**, e54, doi:10.1093/nar/gkw1278 (2017).
- 489 23 Malta, T. M. *et al.* Machine Learning Identifies Stemness Features Associated with Oncogenic  
490 Dedifferentiation. *Cell* **173**, 338-354 e315, doi:10.1016/j.cell.2018.03.034 (2018).
- 491 24 Wang, F. *et al.* Isolation and characterization of intestinal stem cells based on surface marker  
492 combinations and colony-formation assay. *Gastroenterology* **145**, 383-395 e381-321,  
493 doi:10.1053/j.gastro.2013.04.050 (2013).
- 494 25 Qiu, P. Embracing the dropouts in single-cell RNA-seq analysis. *Nat Commun* **11**, 1169,  
495 doi:10.1038/s41467-020-14976-9 (2020).
- 496 26 Alvarez, M. J. *et al.* Functional characterization of somatic mutations in cancer using network-  
497 based inference of protein activity. *Nat Genet* **48**, 838-847, doi:10.1038/ng.3593 (2016).
- 498 27 Lachmann, A., Giorgi, F. M., Lopez, G. & Califano, A. ARACNe-AP: gene network reverse  
499 engineering through adaptive partitioning inference of mutual information. *Bioinformatics* **32**,  
500 2233-2235, doi:10.1093/bioinformatics/btw216 (2016).
- 501 28 Margolin, A. A. *et al.* ARACNE: an algorithm for the reconstruction of gene regulatory networks in  
502 a mammalian cellular context. *BMC Bioinformatics* **7 Suppl 1**, S7, doi:10.1186/1471-2105-7-S1-S7  
503 (2006).
- 504 29 Ding, H. *et al.* Quantitative assessment of protein activity in orphan tissues and single cells using  
505 the metaVIPER algorithm. *Nat Commun* **9**, 1471, doi:10.1038/s41467-018-03843-3 (2018).
- 506 30 Gaspar-Maia, A., Alajem, A., Meshorer, E. & Ramalho-Santos, M. Open chromatin in pluripotency  
507 and reprogramming. *Nat Rev Mol Cell Biol* **12**, 36-47, doi:10.1038/nrm3036 (2011).
- 508 31 Gehart, H. *et al.* Identification of Enteroendocrine Regulators by Real-Time Single-Cell  
509 Differentiation Mapping. *Cell* **176**, 1158-1173 e1116, doi:10.1016/j.cell.2018.12.029 (2019).
- 510 32 Bjerknes, M. & Cheng, H. Clonal analysis of mouse intestinal epithelial progenitors.  
511 *Gastroenterology* **116**, 7-14, doi:10.1016/s0016-5085(99)70222-2 (1999).
- 512 33 Chen, Z. *et al.* Nuclear DEK preserves hematopoietic stem cells potential via NCoR1/HDAC3-  
513 Akt1/2-mTOR axis. *J Exp Med* **218**, doi:10.1084/jem.20201974 (2021).
- 514 34 Ding, Y. *et al.* Smarca5-mediated epigenetic programming facilitates fetal HSPC development in  
515 vertebrates. *Blood* **137**, 190-202, doi:10.1182/blood.2020005219 (2021).
- 516 35 Baggiolini, A. *et al.* Developmental chromatin programs determine oncogenic competence in  
517 melanoma. *Science* **373**, eabc1048, doi:10.1126/science.abc1048 (2021).
- 518 36 Zhang, Z. *et al.* Transcription factor Etv5 is essential for the maintenance of alveolar type II cells.  
519 *Proc Natl Acad Sci U S A* **114**, 3903-3908, doi:10.1073/pnas.1621177114 (2017).
- 520 37 Perekatt, A. O. *et al.* YY1 is indispensable for Lgr5+ intestinal stem cell renewal. *Proc Natl Acad Sci*  
521 *U S A* **111**, 7695-7700, doi:10.1073/pnas.1400128111 (2014).
- 522 38 Yu, T. *et al.* SRSF1 governs progenitor-specific alternative splicing to maintain adult epithelial  
523 tissue homeostasis and renewal. *Dev Cell* **57**, 624-637 e624, doi:10.1016/j.devcel.2022.01.011  
524 (2022).
- 525 39 Kaji, K. *et al.* The NuRD component Mbd3 is required for pluripotency of embryonic stem cells.  
526 *Nat Cell Biol* **8**, 285-292, doi:10.1038/ncb1372 (2006).
- 527 40 Han, S. *et al.* Defining the Identity and Dynamics of Adult Gastric Isthmus Stem Cells. *Cell Stem*  
528 *Cell* **25**, 342-356 e347, doi:10.1016/j.stem.2019.07.008 (2019).
- 529 41 Mull, A. N., Klar, A. & Navara, C. S. Differential localization and high expression of SURVIVIN splice  
530 variants in human embryonic stem cells but not in differentiated cells implicate a role for  
531 SURVIVIN in pluripotency. *Stem Cell Res* **12**, 539-549, doi:10.1016/j.scr.2014.01.002 (2014).

- 532 42 Percharde, M. *et al.* A LINE1-Nucleolin Partnership Regulates Early Development and ESC Identity. *Cell* **174**, 391-405 e319, doi:10.1016/j.cell.2018.05.043 (2018).  
533
- 534 43 Yan, K. S. *et al.* Non-equivalence of Wnt and R-spondin ligands during Lgr5(+) intestinal stem-cell  
535 self-renewal. *Nature* **545**, 238-242, doi:10.1038/nature22313 (2017).
- 536 44 Bezencon, C. *et al.* Murine intestinal cells expressing Trpm5 are mostly brush cells and express  
537 markers of neuronal and inflammatory cells. *J Comp Neurol* **509**, 514-525, doi:10.1002/cne.21768  
538 (2008).
- 539 45 Middelhoff, M. *et al.* Prox1-positive cells monitor and sustain the murine intestinal epithelial  
540 cholinergic niche. *Nat Commun* **11**, 111, doi:10.1038/s41467-019-13850-7 (2020).
- 541 46 van der Flier, L. G. *et al.* Transcription factor achaete scute-like 2 controls intestinal stem cell fate.  
542 *Cell* **136**, 903-912, doi:10.1016/j.cell.2009.01.031 (2009).
- 543 47 Fafilek, B. *et al.* Troy, a tumor necrosis factor receptor family member, interacts with Lgr5 to inhibit  
544 wnt signaling in intestinal stem cells. *Gastroenterology* **144**, 381-391,  
545 doi:10.1053/j.gastro.2012.10.048 (2013).
- 546 48 de Lau, W., Peng, W. C., Gros, P. & Clevers, H. The R-spondin/Lgr5/Rnf43 module: regulator of  
547 Wnt signal strength. *Genes Dev* **28**, 305-316, doi:10.1101/gad.235473.113 (2014).
- 548 49 Basak, O. *et al.* Troy+ brain stem cells cycle through quiescence and regulate their number by  
549 sensing niche occupancy. *Proc Natl Acad Sci U S A* **115**, E610-E619, doi:10.1073/pnas.1715911114  
550 (2018).
- 551 50 Snippert, H. J. *et al.* Intestinal crypt homeostasis results from neutral competition between  
552 symmetrically dividing Lgr5 stem cells. *Cell* **143**, 134-144, doi:10.1016/j.cell.2010.09.016 (2010).
- 553 51 Lopez-Garcia, C., Klein, A. M., Simons, B. D. & Winton, D. J. Intestinal stem cell replacement follows  
554 a pattern of neutral drift. *Science* **330**, 822-825, doi:10.1126/science.1196236 (2010).
- 555 52 Tan, S. H. *et al.* A constant pool of Lgr5(+) intestinal stem cells is required for intestinal  
556 homeostasis. *Cell Rep* **34**, 108633, doi:10.1016/j.celrep.2020.108633 (2021).
- 557 53 Orre, L. M., Pernemalm, M., Lengqvist, J., Lewensohn, R. & Lehtio, J. Up-regulation, modification,  
558 and translocation of S100A6 induced by exposure to ionizing radiation revealed by proteomics  
559 profiling. *Mol Cell Proteomics* **6**, 2122-2131, doi:10.1074/mcp.M700202-MCP200 (2007).
- 560 54 Madureira, P. A., Hill, R., Lee, P. W. & Waisman, D. M. Genotoxic agents promote the nuclear  
561 accumulation of annexin A2: role of annexin A2 in mitigating DNA damage. *PLoS One* **7**, e50591,  
562 doi:10.1371/journal.pone.0050591 (2012).
- 563 55 Awasthi, Y. C., Ramana, K. V., Chaudhary, P., Srivastava, S. K. & Awasthi, S. Regulatory roles of  
564 glutathione-S-transferases and 4-hydroxynonenal in stress-mediated signaling and toxicity. *Free  
565 Radic Biol Med* **111**, 235-243, doi:10.1016/j.freeradbiomed.2016.10.493 (2017).
- 566 56 Whitaker, A. M., Flynn, T. S. & Freudenthal, B. D. Molecular snapshots of APE1 proofreading  
567 mismatches and removing DNA damage. *Nat Commun* **9**, 399, doi:10.1038/s41467-017-02175-y  
568 (2018).
- 569 57 Oppikofer, M. *et al.* Non-canonical reader modules of BAZ1A promote recovery from DNA  
570 damage. *Nat Commun* **8**, 862, doi:10.1038/s41467-017-00866-0 (2017).
- 571 58 Yui, S. *et al.* YAP/TAZ-Dependent Reprogramming of Colonic Epithelium Links ECM Remodeling to  
572 Tissue Regeneration. *Cell Stem Cell* **22**, 35-49 e37, doi:10.1016/j.stem.2017.11.001 (2018).
- 573 59 Buczacki, S. J. *et al.* Intestinal label-retaining cells are secretory precursors expressing Lgr5. *Nature*  
574 **495**, 65-69, doi:10.1038/nature11965 (2013).
- 575 60 Leushacke, M. *et al.* Lgr5-expressing chief cells drive epithelial regeneration and cancer in the  
576 oxyntic stomach. *Nat Cell Biol* **19**, 774-786, doi:10.1038/ncb3541 (2017).
- 577 61 Sigal, M. *et al.* R-spondin-3 induces secretory, antimicrobial Lgr5(+) cells in the stomach. *Nat Cell  
578 Biol* **21**, 812-823, doi:10.1038/s41556-019-0339-9 (2019).

579 62 Hayakawa, Y., Nakagawa, H., Rustgi, A. K., Que, J. & Wang, T. C. Stem cells and origins of cancer in  
580 the upper gastrointestinal tract. *Cell Stem Cell* **28**, 1343-1361, doi:10.1016/j.stem.2021.05.012  
581 (2021).  
582 63 Schuijers, J. *et al.* Ascl2 acts as an R-spondin/Wnt-responsive switch to control stemness in  
583 intestinal crypts. *Cell Stem Cell* **16**, 158-170, doi:10.1016/j.stem.2014.12.006 (2015).  
584 64 Shao, J. & Sheng, H. Amphiregulin promotes intestinal epithelial regeneration: roles of intestinal  
585 subepithelial myofibroblasts. *Endocrinology* **151**, 3728-3737, doi:10.1210/en.2010-0319 (2010).  
586 65 Gregorieff, A., Liu, Y., Inanlou, M. R., Khomchuk, Y. & Wrana, J. L. Yap-dependent reprogramming  
587 of Lgr5(+) stem cells drives intestinal regeneration and cancer. *Nature* **526**, 715-718,  
588 doi:10.1038/nature15382 (2015).

589

## Isthmal stem cells sustain intestinal homeostasis and regeneration

Malagola E., Vasciaveo A., Ochiai Y., Kim W., Middelhoff M., Nienhüser H., Belin B., LaBella J.,  
Zamechek LB., Wong M.H., Li L., Guha C., Yan K., Califano A., and Wang T.C.

### Figure panels

**Figure 1:** An unbiased approach to elucidate the organization of intestinal crypt epithelial cells

**Figure 2:** *Lgr5* expression is not restricted to intestinal stem and progenitor cells

**Figure 3:** Isthmal stem cells sustain intestinal tissue homeostasis

**Figure 4:** *Lgr5*<sup>neg</sup> proliferating cells compensate for loss of *Lgr5* expressing cells

**Figure 5:** Surviving isthmal stem cells regenerate the intestinal epithelium following IR damage



**Figure 1**

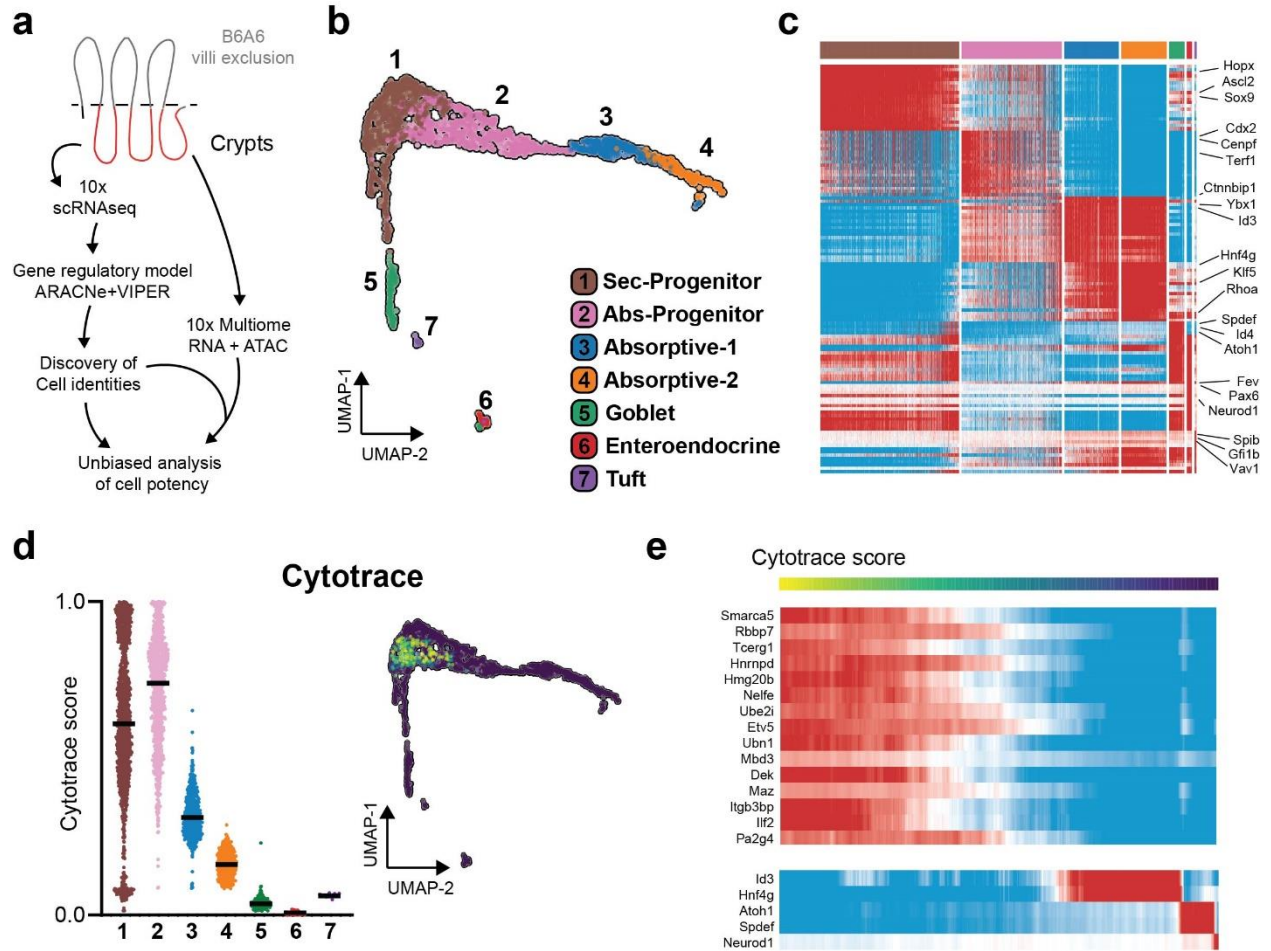

**An unbiased approach to elucidate the organization of intestinal crypt epithelial cells: a.** Schematic representation of the experimental workflow and computational pipeline for the analysis of crypt epithelial cells. (See *methods*) **b.** UMAP plot showing protein activity -based clustering solution based on gene regulatory network analysis. **c.** Heatmap showing top differentially activated regulatory proteins. **d.** Violin-plot and UMAP plot (top 10% cells are colored) showing CytoTRACE scores for individual cells; black line indicate median value per cluster. **e.** Pseudotime analysis using CytoTRACE scores to order cells based on inferred cell potency (high to low potency from left to right), showing protein activity changes of top correlating regulatory proteins. On the bottom, protein activity profile for known transcription factors involved in cellular differentiation.

**Figure 2**

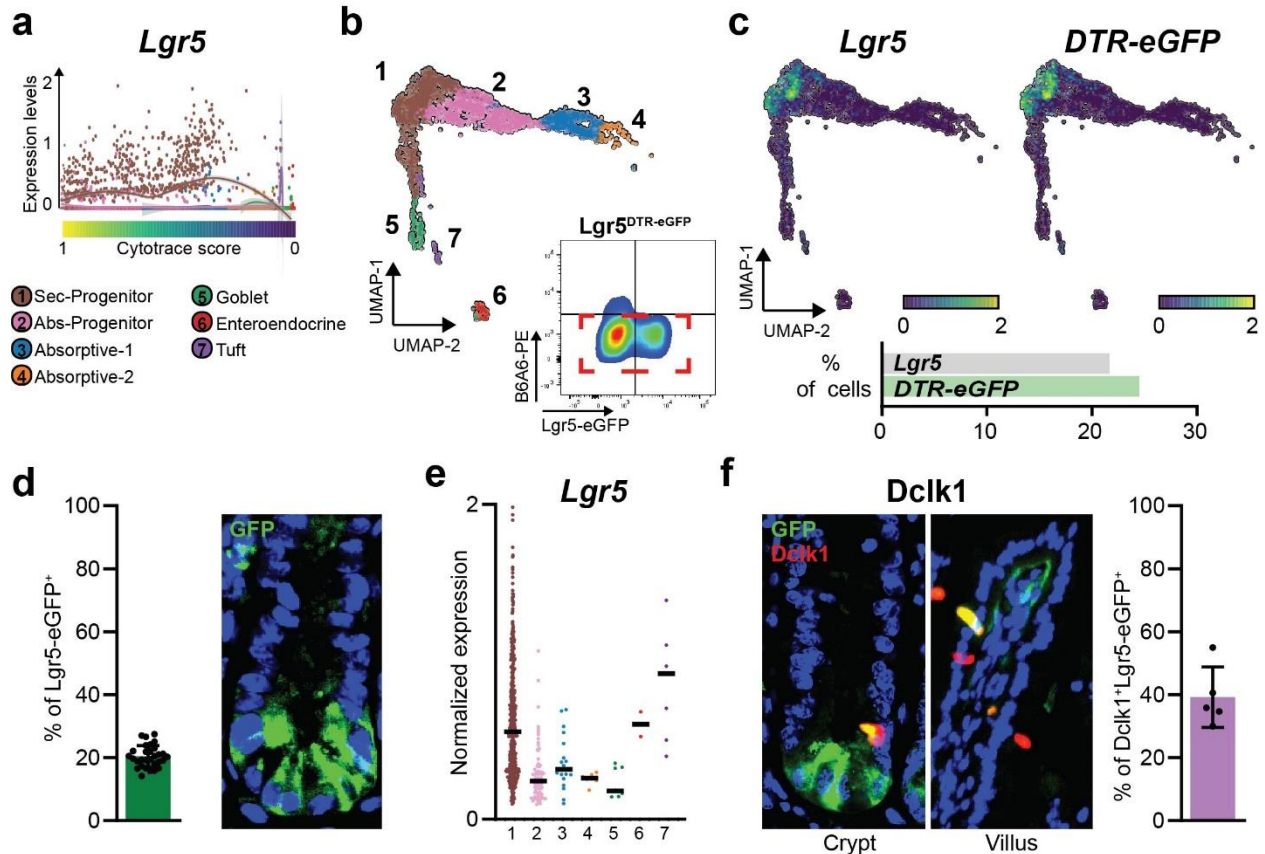

***Lgr5* expression is not restricted to intestinal stem and progenitor cells:** **a.** Pseudotime analysis using CytoTRACE scores to order cells based on inferred cell potency (high to low potency from left to right), showing expression levels of *Lgr5*. **b.** Sorting strategy and UMAP plot of *Lgr5*<sup>DTR-eGFP</sup> crypt epithelial cells. (Sorted gate highlighted in Red) **c.** UMAP plots showing expression of *Lgr5*<sup>Wt</sup> and *Lgr5*<sup>DTR-eGFP</sup> alleles, below bar-plot showing the number of cells expressing each allele in the dataset (as % of total cells). **d.** Flow cytometry quantification of *Lgr5*-eGFP<sup>+</sup> cells in purified crypts (n=30); together with representative image of immunofluorescence staining for *Lgr5*-eGFP in mouse jejunum. **e.** Violin-plot showing expression levels of *Lgr5* in the identified clusters (only *Lgr5*<sup>+</sup> cells are shown). **f.** Immunofluorescence staining for *Dclk1* and bar-plot showing quantification of double positive cells (*Dclk1*<sup>+</sup>*Lgr5*-eGFP<sup>+</sup> over total *Dclk1*<sup>+</sup>) (n=5).

**Figure 3:**

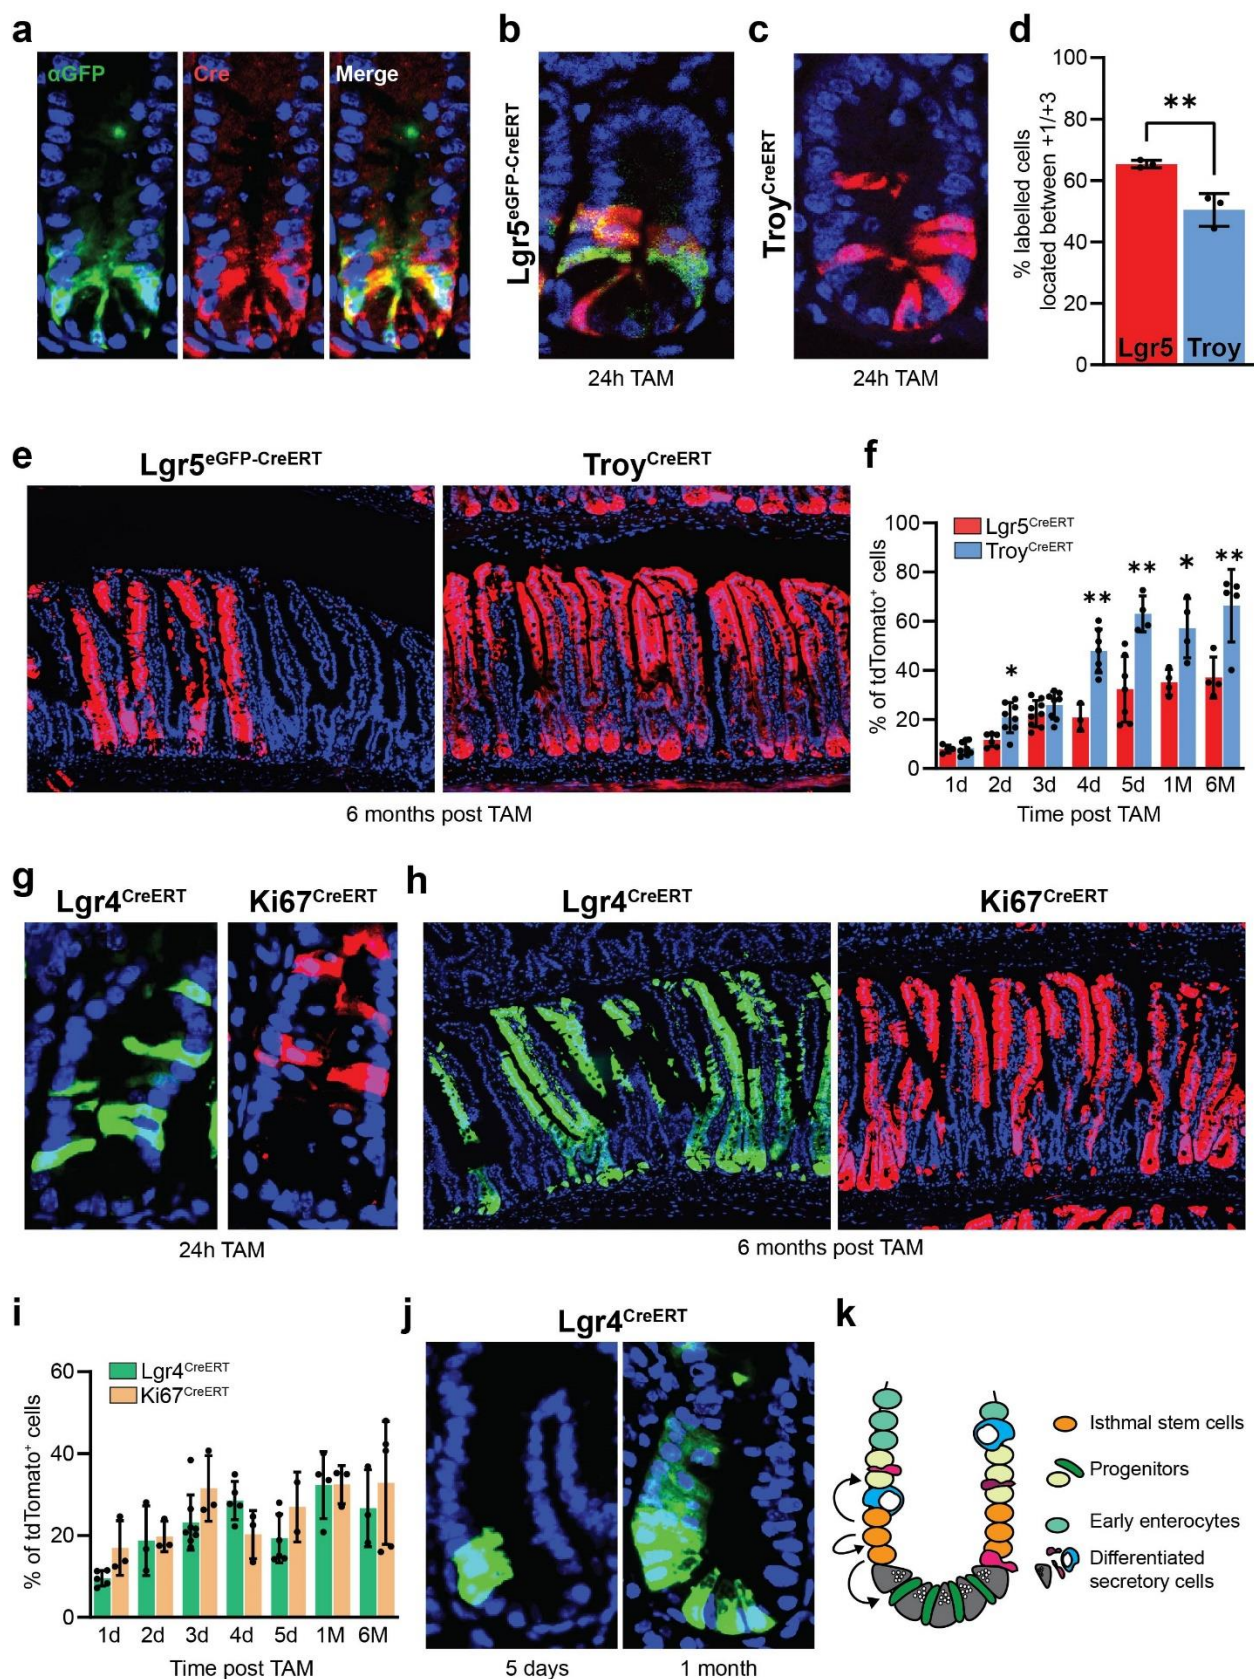

**Isthmal stem cells sustain intestinal tissue homeostasis:** **a.** Representative images of immunofluorescence staining for eGFP and Cre in  $Lgr5^{eGFP-CreERT}$  mouse jejunum. **b.** Representative image of  $Lgr5^{eGFP-CreERT}$  mice 24 hours post TAM induction. **c.** Representative image of  $Troy^{CreERT}$  mice 24 hours post TAM induction. **d.** % of tdTomato<sup>+</sup> cells from  $Lgr5^{eGFP-CreERT}$  and  $Troy^{CreERT}$  mice located within the +1/+3 position in intestinal crypts at day 1. (n=3) **e.** Representative images of  $Lgr5^{eGFP-CreERT}$  and  $Troy^{CreERT}$  mice 6 months post TAM induction. **f.** Flow cytometry based quantification of tdTomato<sup>+</sup> cells in crypt epithelial cells at indicated time points (n≥3). **g.** Representative images of  $Lgr4^{CreERT}$  and  $Ki67^{CreERT}$  mice 24h post TAM induction. **h.** Representative images of  $Lgr4^{CreERT}$  and  $Ki67^{CreERT}$  mice 6 months post TAM induction. **i.** Flow cytometry based quantification of tdTomato<sup>+</sup> cells at indicated time points (n≥3). **j.** Representative images showing evidences of tracing ribbons at 5 days or 1 month post TAM without CBC labelling. **k.** Schematic representation of the model proposed. Statistical method: Unpaired t-test, two-tailed; \*: p<0.05, \*\*: p<0.01, \*\*\*: p<0.01, \*\*\*\*: p<0.01.

**Figure 4**

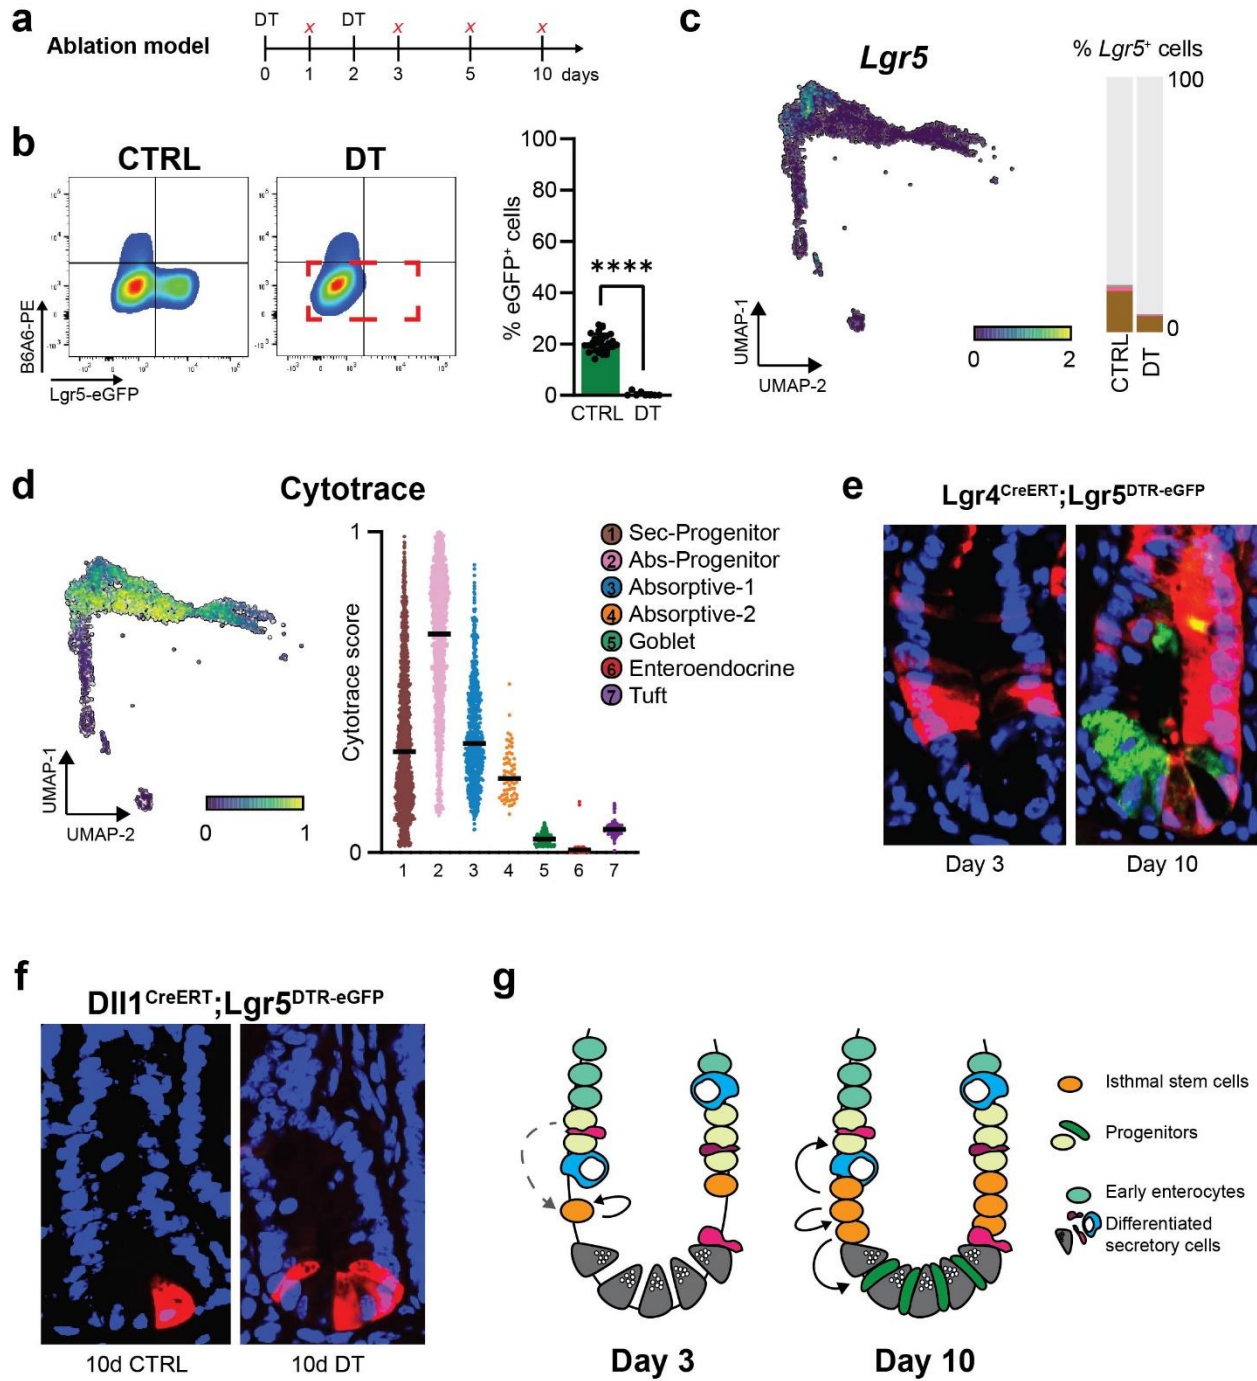

**Lgr5<sup>neg</sup> proliferating cells compensate for loss of Lgr5 expressing cells:** **a.** Schematic representation of DT based ablation model. **b.** Sorting strategy (left) analysis of crypt epithelial cells in CTRL or DT ablated mice (sorted gate in red), (right) flow cytometry quantification of Lgr5<sup>DTR<sup>re</sup>GFP<sup>+</sup></sup> cells in control and DT treated crypts (n≥10). **c.** UMAP plot showing expression levels of *Lgr5* in the DT treated dataset, on the right bar-plot showing % of detected expressing cells relative to control. Cells are colored based on clusters. **d.** UMAP and violin plots showing CytoTRACE score in DT treated epithelial cells. **e.** Representative images for Lgr4<sup>CreERT</sup> lineage tracing upon concurrent DT treatment. **f.** Representative images of Dll1<sup>CreERT</sup> mice 10 days post TAM induction with or without DT treatment. **g.** Schematic representation of the model proposed, on the left layout of intestinal crypts 3 days post DT treatment, at day 10 (on the right) cells turn back to homeostatic organization. Gray dotted line indicate the possibility for early progenitors to serve as ISC. Statistical method: Unpaired t-test, two-tailed; \*: p<0.05, \*\*: p<0.01, \*\*\*: p<0.01, \*\*\*\*: p<0.01.

**Figure 5**

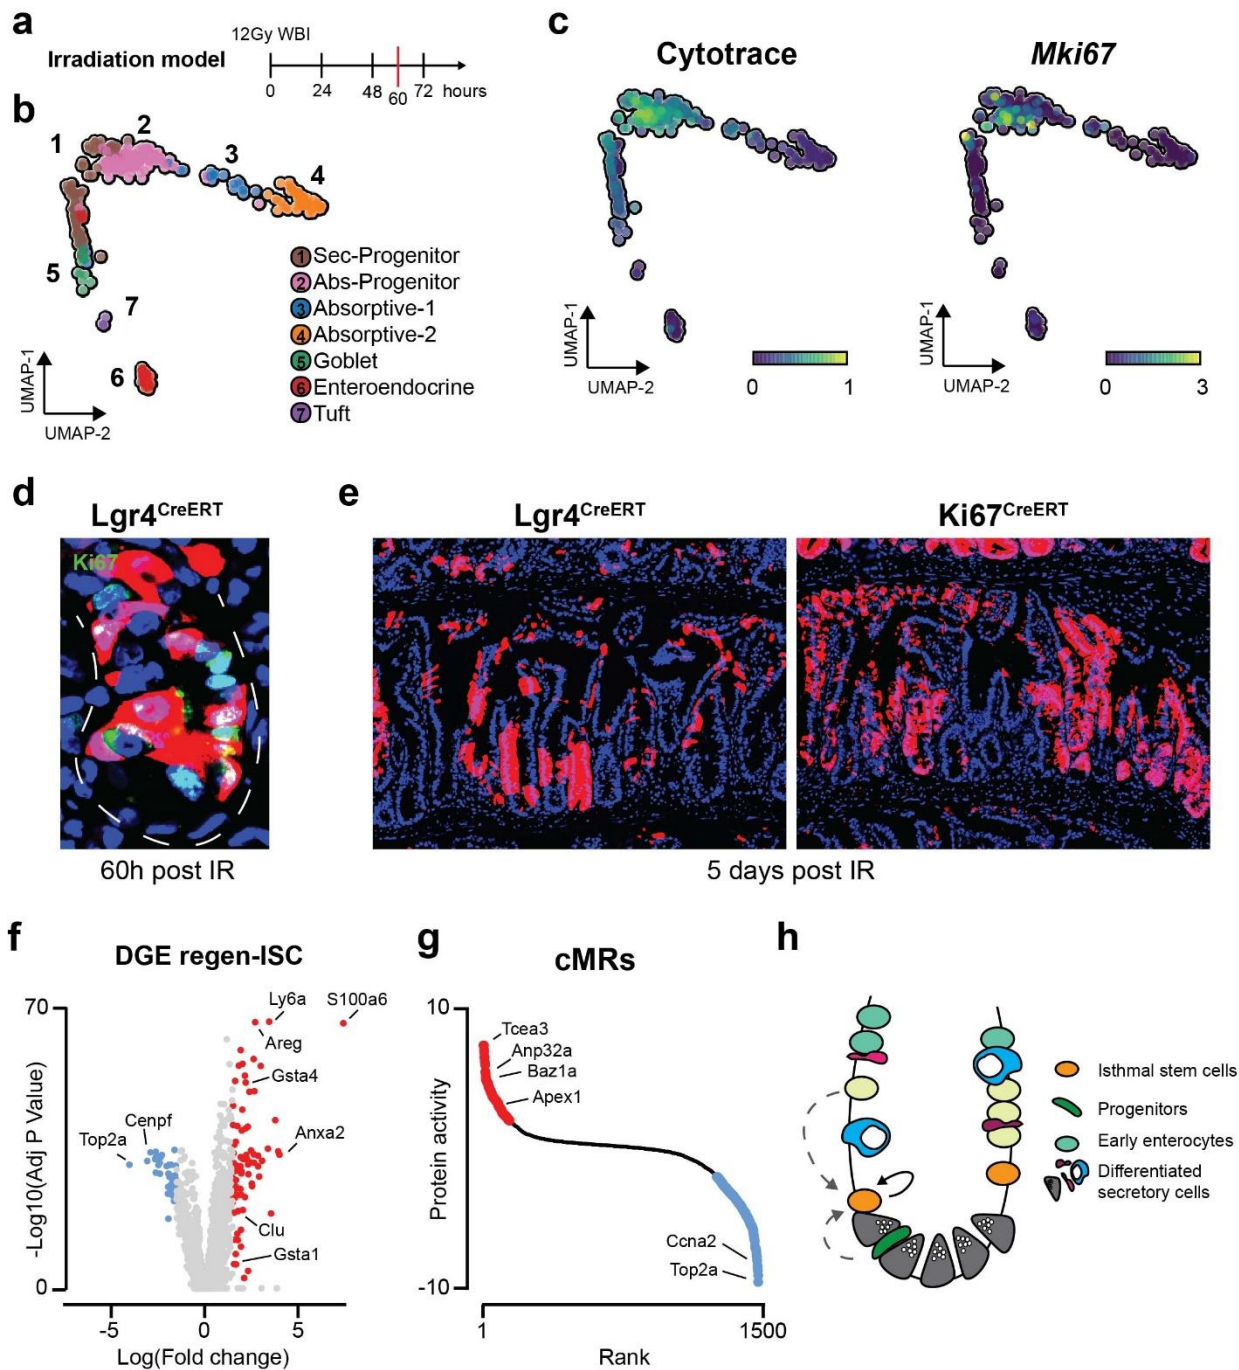

**Surviving isthmal stem cells regenerate the intestinal epithelium following IR damage: a.**

Schematic representation of irradiation damage model. **b.** UMAP plot showing protein activity based clustering solution for irradiated crypt epithelial cells. **c.** UMAP plots showing both inferred cell potency through CytoTRACE and *Mki67* expression in irradiated crypt epithelial cells. **d.** Representative image for Ki67 staining 60h post IR. **e.** Representative images of *Lgr4*<sup>CreERT</sup> and *Ki67*<sup>CreERT</sup> lineage tracing 5 days post IR. **f.** Volcano plot of differentially expressed genes in regenerating (positive LogFC) vs homeostatic ISC (negative LogFC). **g.** Signature of differentially activated regulatory proteins in ISC resulting from exposure to IR damage. Proteins are ranked (left to right) based on computed protein activity score. **h.** Schematic representation of the model proposed of surviving intestinal cells after IR exposure. Dotted gray lines indicate the putative involvement of early progenitors to serve as ISC.



## **Isthmal stem cells sustain intestinal homeostasis and regeneration**

Malagola E., Vasciaveo A., Ochiai Y., Kim W., Middelhoff M., Nienhüser H., Belin B., LaBella J.,  
Zamechek LB., Wong M.H., Li L., Guha C., Yan K., Califano A., and Wang T.C.

### **Extended Data and Methods**

Extended Data Figures 1-11

List of Extended Data Table

Methods description

## Extended Data Figure 1

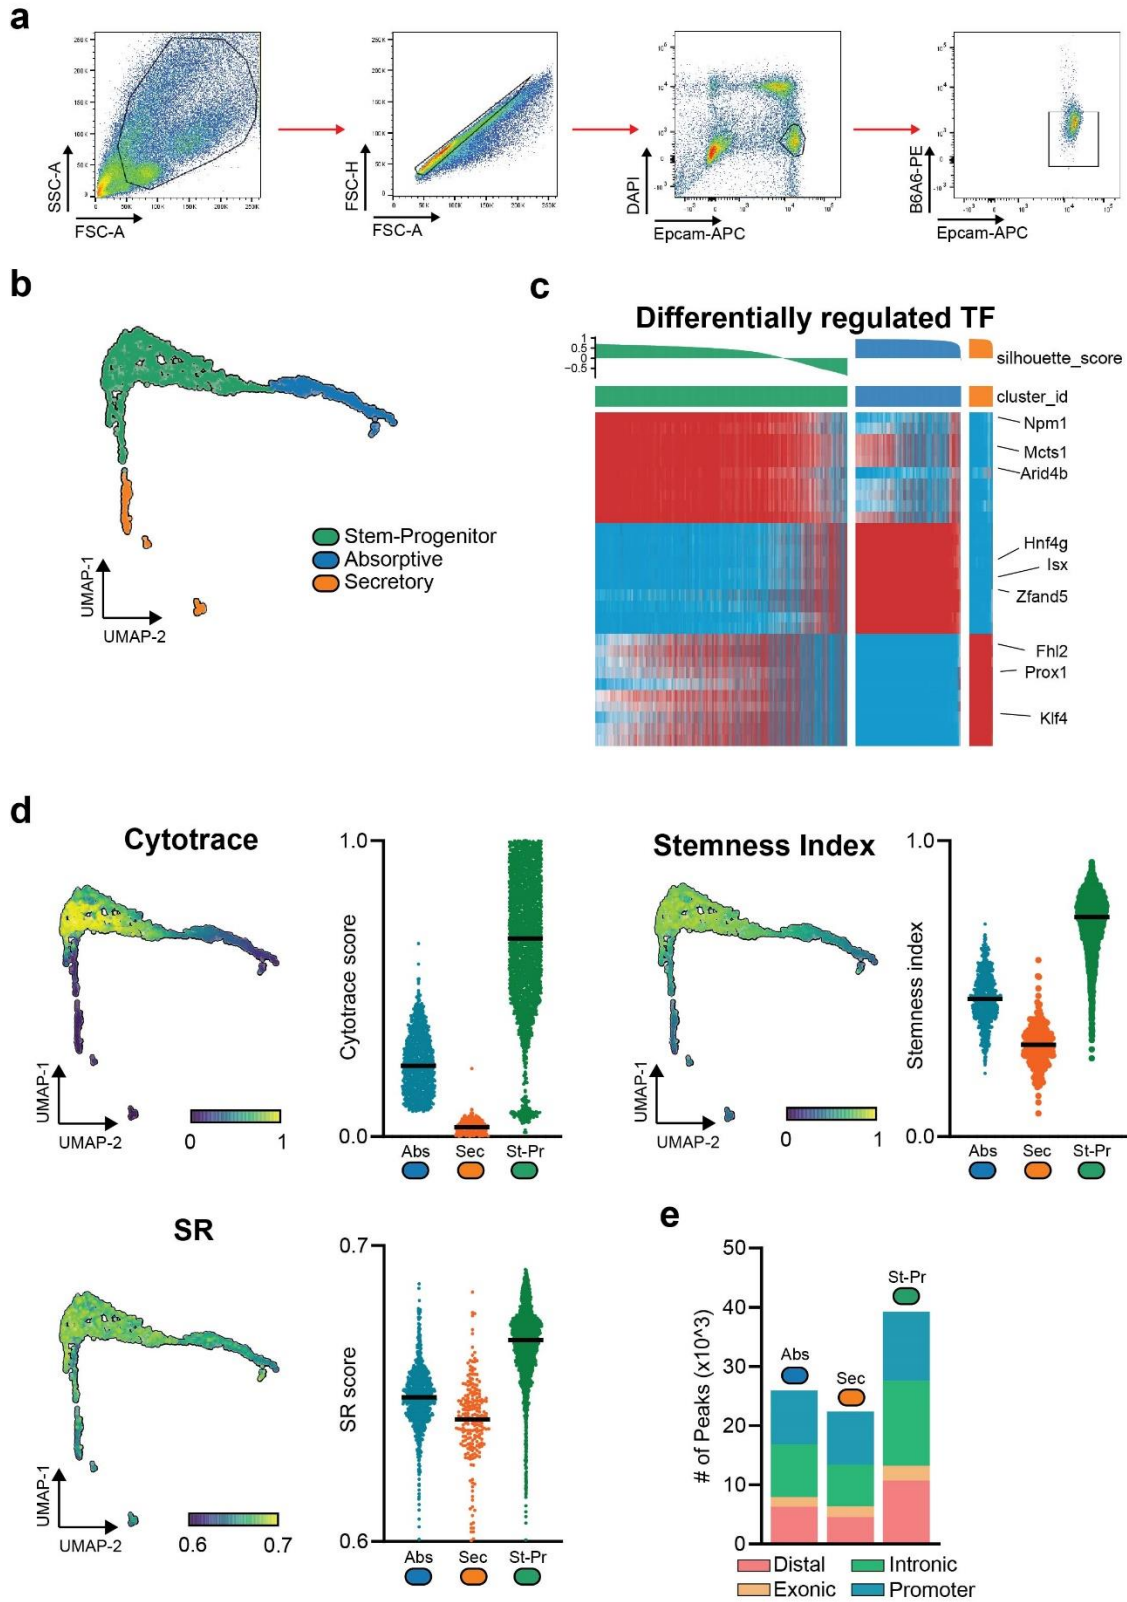

**Extended Data Figure1:** **a.** Gating strategy used for flow-cytometry based sorting of crypt epithelial cells. **b.** UMAP plot showing protein activity-based clustering solution. **c.** Heatmap showing top differentially activated regulatory proteins. On top, computed silhouette scores for individual cells. **d.** UMAP and Violin plots showing CytoTRACE, Stemness index, and Signaling Entropy (SR) scores computed for individual cells. **e.** Bar plot showing number of identified accessible peaks per cluster based on scATACseq.

## Extended Data Figure 2

**a**

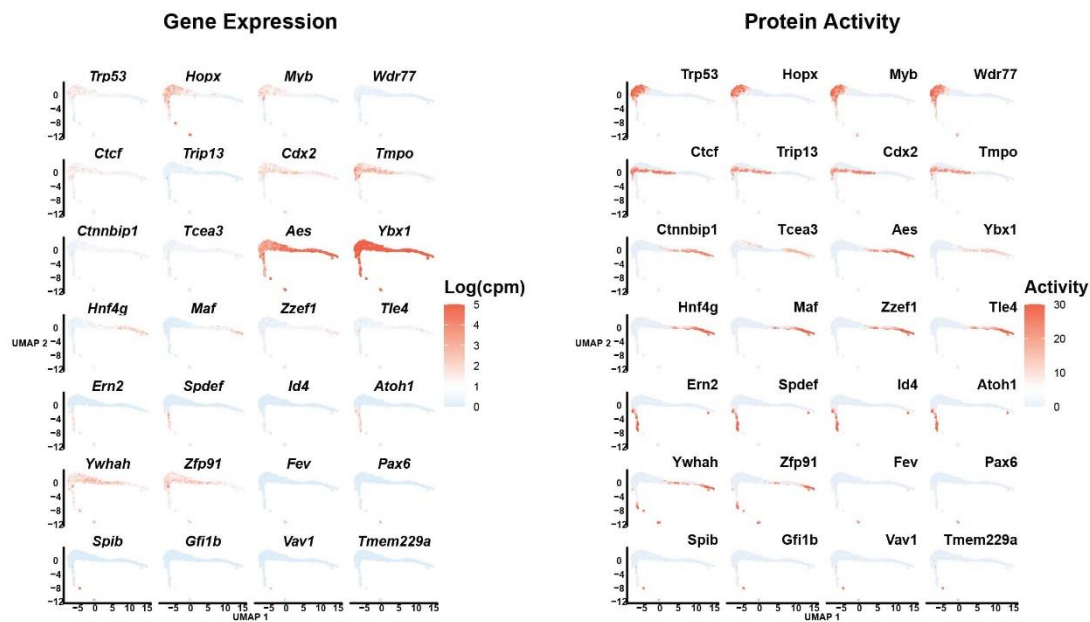

**b**

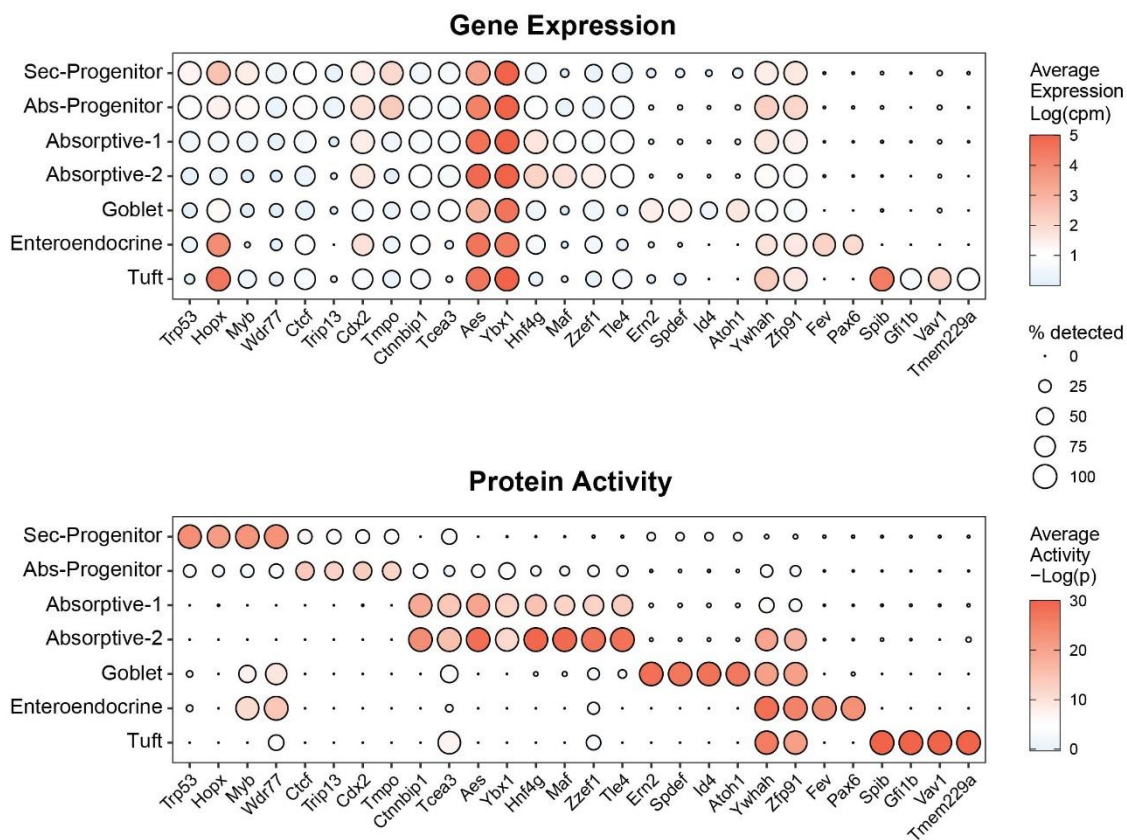

**Extended Data Figure2: a.** Showing UMAP plots of top 4 markers for each cluster (rows) as identified from protein activity-based clustering. Panel on the left shows gene expression as  $\log(\text{cpm})$ , while panel on the right shows for the same markers the corresponding protein activity as  $-\log_{10}(p)$ . **b.** Same cluster-specific markers are shown as dot plots. Protein activity shows higher sensitivity and specificity than gene expression.

### Extended Data Figure 3

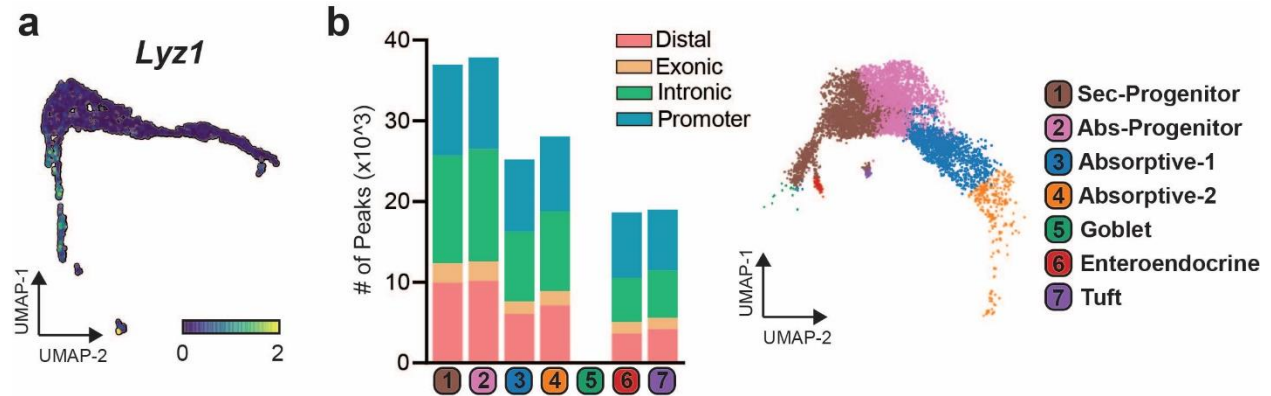

**Extended Data Figure3: a.** UMAP plot showing expression domain for *Lyz1*. **b.** Bar plot showing number of accessible peaks per cluster together with UMAP plot showing clustering results for multiome dataset; note cluster 5 consist of very few cells and was therefore excluded from further analyses.

## Extended Data Figure 4:

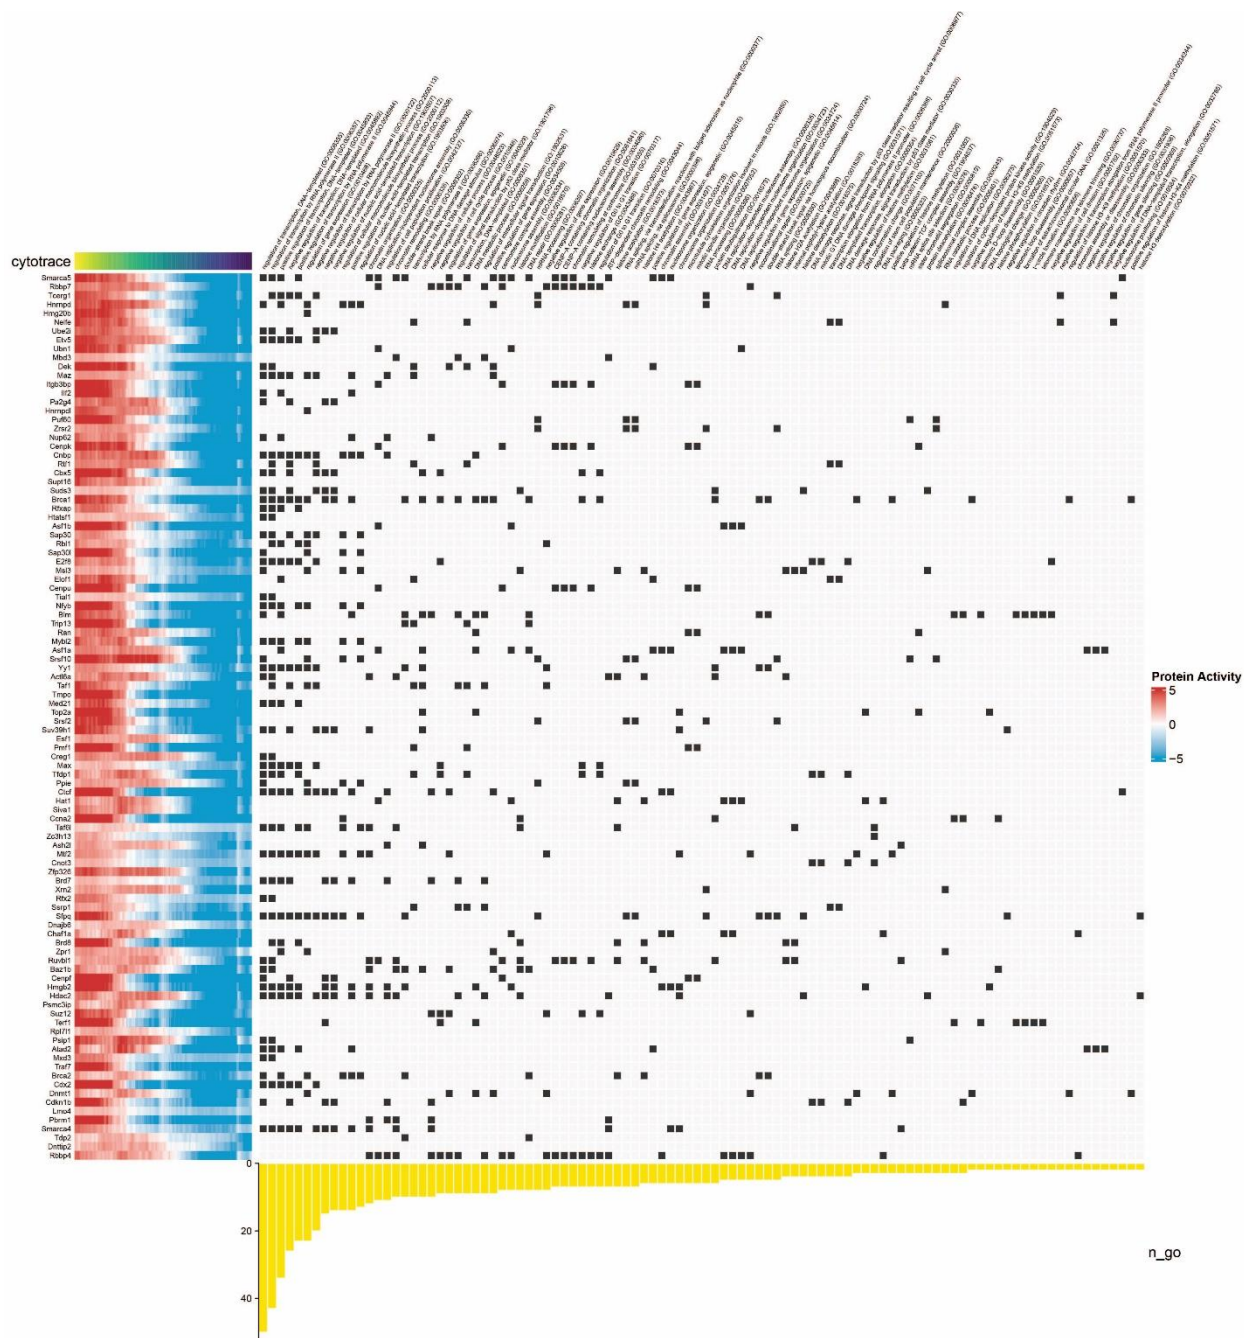

**Extended Data Figure 4:** On the left, strip plots showing inferred activity of the 100 CytoTRACE score-based top-correlating transcriptional regulators. On the right, top GO-associated terms for each regulatory protein, using ‘Molecular Function’ as query.

## Extended Data Figure 5:

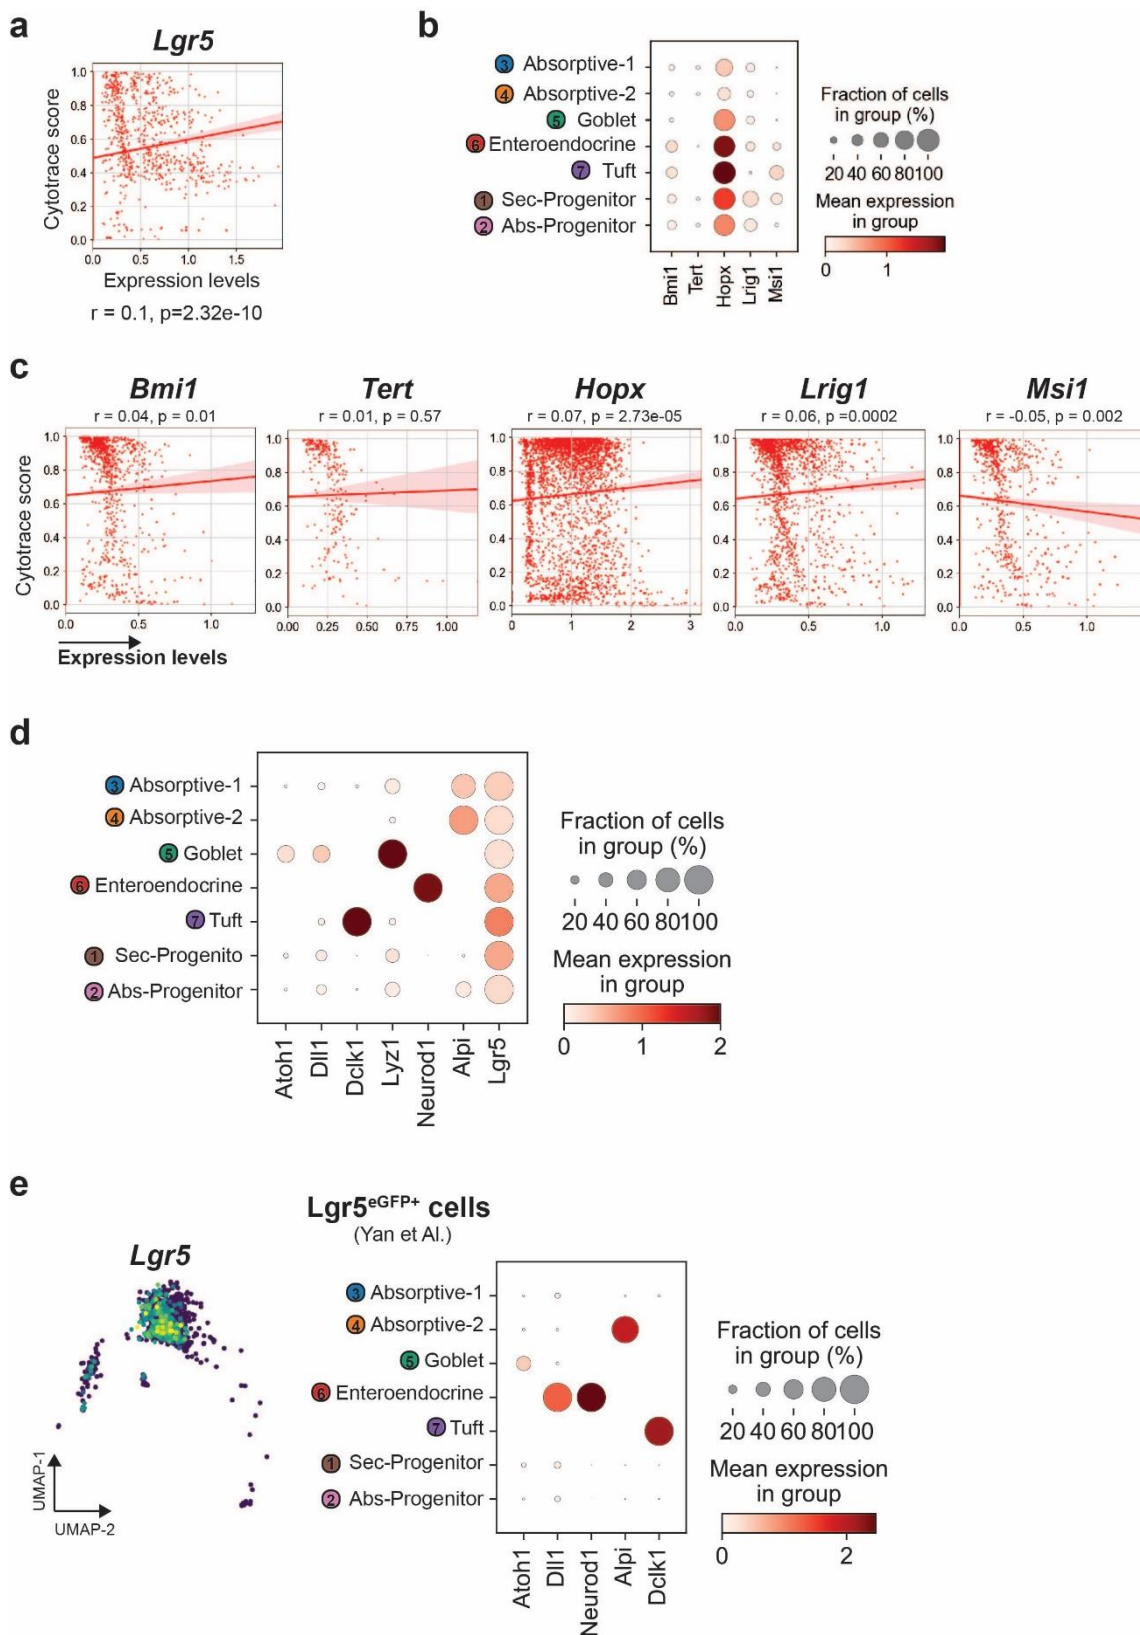



**Extended Data Figure 5:** **a.** Correlation plot of *Lgr5* and CytoTRACE score. **b.** Dot-plot showing broad pattern of expression for multiple proposed markers of ISC. **c.** Correlation plots between CytoTRACE and expression levels of proposed ISC markers. **d.** Dot-plot showing expression of known markers of differentiation in *Lgr5* expressing cells. **e.** Left: UMAP distribution plot showing expression of *Lgr5* in *Lgr5*<sup>eGFP+</sup> sorted cells; right: Dotplot showing expression of markers of differentiated cells.

## Extended Data Figure 6

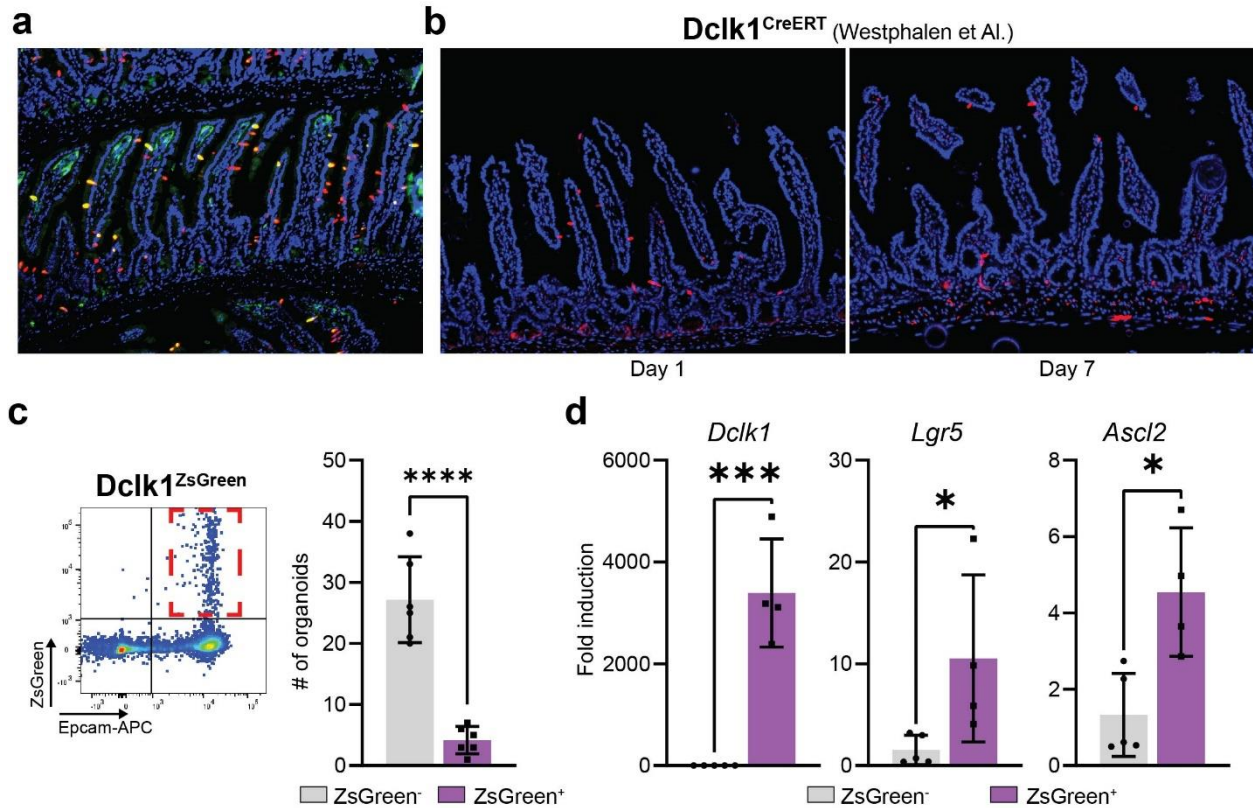

**Extended data Figure 6: a.** Representative image of low power magnification view of Dclk1 (Red) and eGFP (green) in intestinal jejunum of a *Lgr5<sup>DTR:eGFP</sup>* mouse. **b.** Lineage tracing analysis of *Dclk1<sup>CreERT</sup>* mouse model. At day 1 scattered tdTomato<sup>+</sup> Tuft cells can be observed, at day 7 post TAM most tdTomato<sup>+</sup> cells are washed out. **c.** On the left, sorting strategy for the isolation of *Dclk1<sup>ZsGreen+</sup>* cells (Red gate); on the right barplot showing quantification of the number of organoids *in vitro* (n=2). **d.** Bar-plots showing expression levels of *Dclk1*, *Lgr5*, and *Ascl2* in sorted *Dclk1<sup>ZsGreen+</sup>* cells. (Expression presented as fold induction relative to the negative population) (n=4). . Statistical method: Unpaired t-test, two-tailed; \*: p<0.05, \*\*: p<0.01, \*\*\*: p<0.01, \*\*\*\*: p<0.01.

**Extended Data Figure 7:**

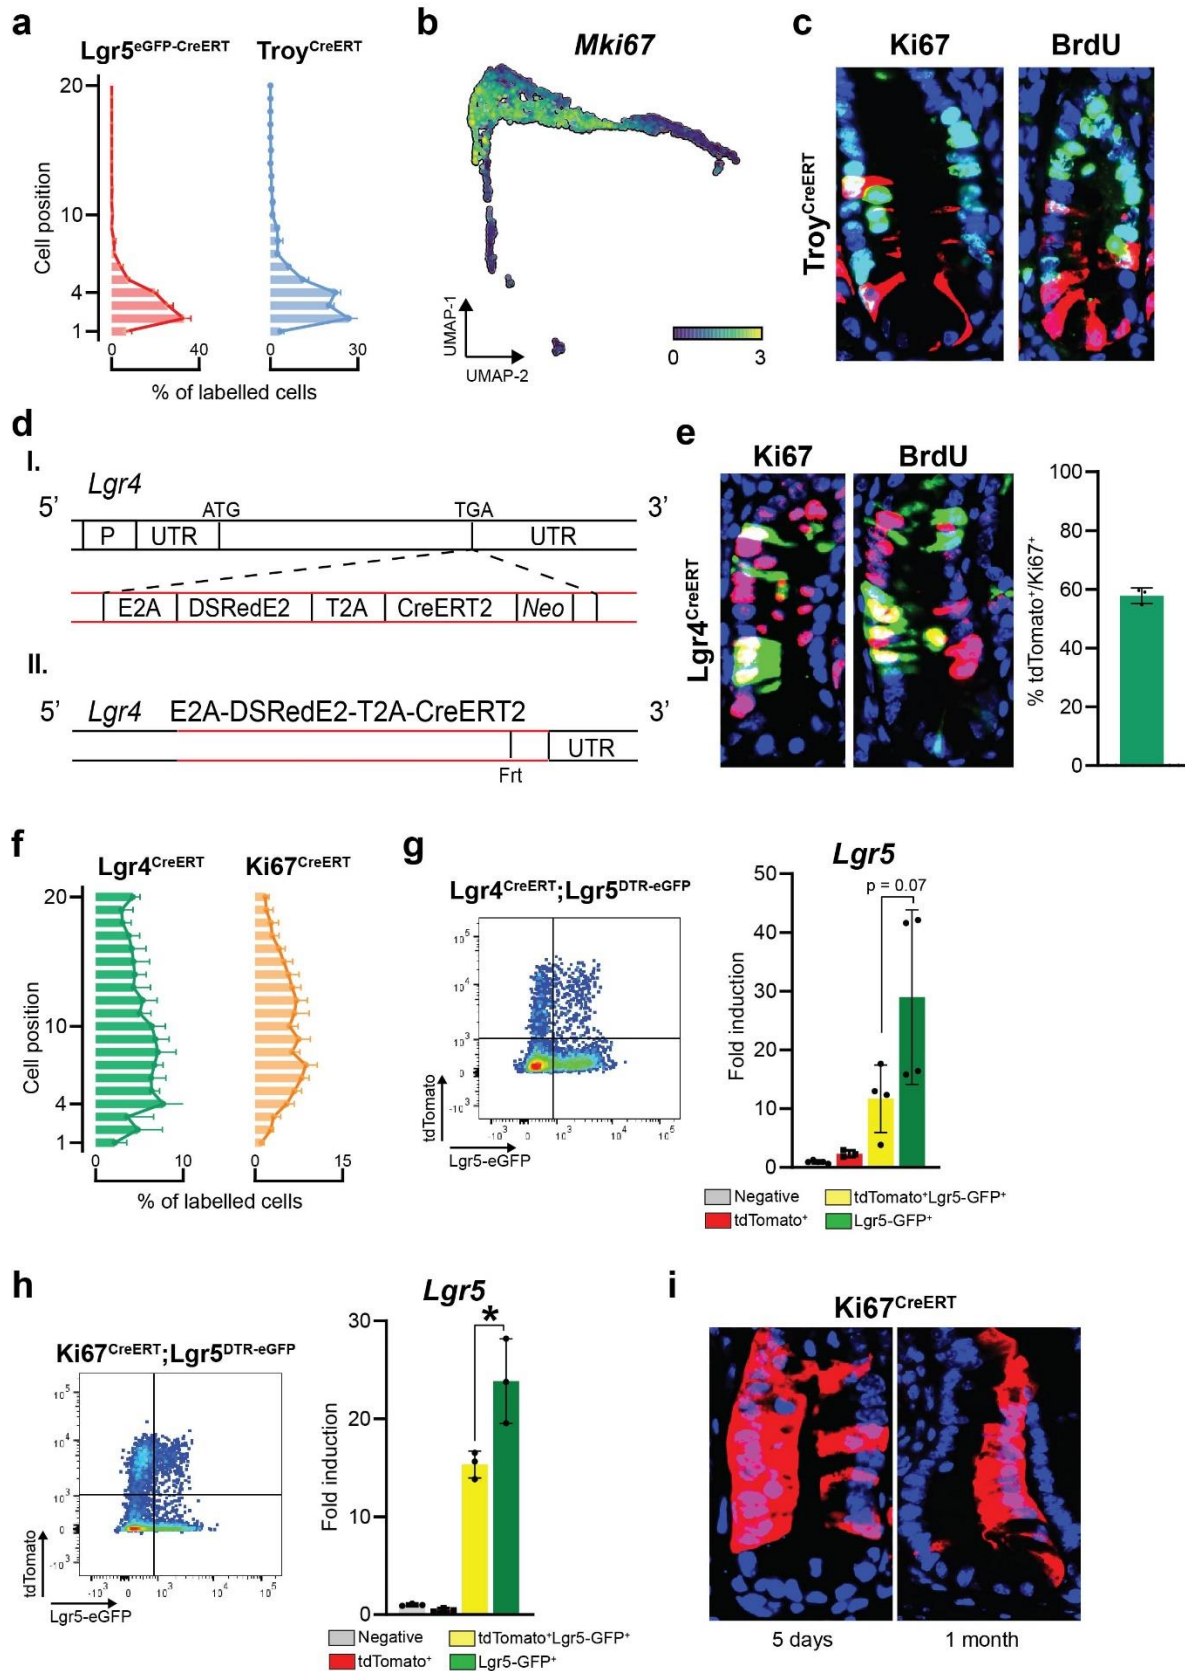

**Extended Data Figure 7:** **a.** Position based counting of tdTomato<sup>+</sup> cells 24h post TAM administration in Lgr5<sup>CreERT</sup> and Troy<sup>CreERT</sup> mice. (n=3) **b.** UMAP plot showing expression of Mki67 in crypt epithelial cells. **c.** Representative images of IF staining for Ki67 and BrdU (in green) in Troy<sup>CreERT</sup> mice 24 hours post TAM induction. **d.** Designing strategy for the Lgr4<sup>CreERT</sup> mouse model. (See methods). **e.** Representative images of IF staining for Ki67 and BrdU (in red) in Lgr4<sup>CreERT</sup> mice 24 hours post TAM induction (R26-ZsGreen); on the right quantification of labelled cells also positive for Ki67 (n=3) **f.** Position based counting of labelled cells 24h post TAM administration in Lgr4<sup>CreERT</sup> and Ki67<sup>CreERT</sup> mice. **g-h.** Flow cytometry analysis of overlap between Lgr4 and Ki67 labelled cells (24h) and Lgr5<sup>eGFP+</sup> cells; together with bar plot showing expression levels of *Lgr5* in single sorted cells, groups labelled in the panel. (Lgr4: n=4, Ki67: n=3). **i.** Representative images of lineage traced glands (Ki67<sup>CreERT</sup>) at the indicated time points post TAM induction. Statistical method: Unpaired t-test, two-tailed; \*: p<0.05, \*\*: p<0.01, \*\*\*: p<0.01, \*\*\*\*: p<0.01.

## Extended Data Figure 8:

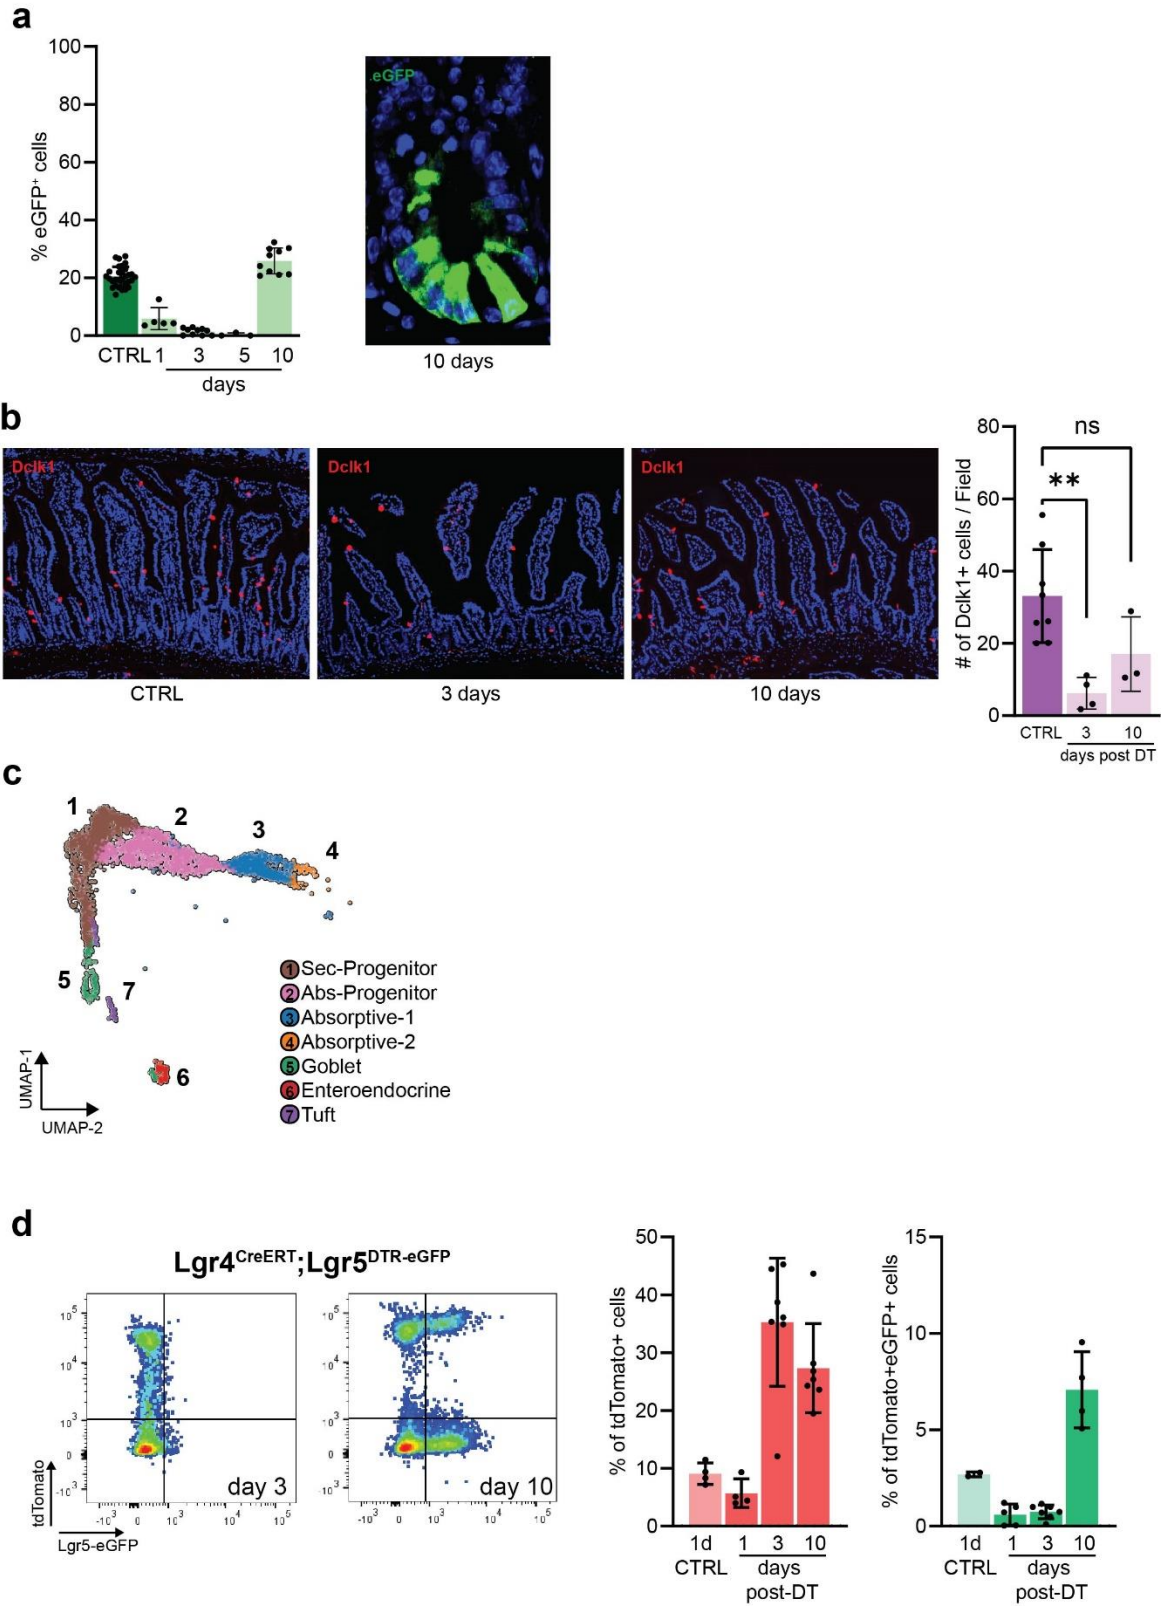

**Extended Data Figure 8:** **a.** Flow cytometry quantification of Lgr5<sup>eGFP+</sup> cells in purified crypts (n≥3). On the right, representative images of Lgr5<sup>eGFP</sup> 10 days after the first dose of DT. **b.** Representative images for Dclk1 staining of intestine following DT treatment together with bar plot showing quantification of the number of Dclk1+ cells at indicated time points (n≥4). **c.** UMAP plot showing recovered clusters in DT treated epithelial cells. **d.** Flow cytometry analysis and quantification of tdTomato+ cells (Lgr4<sup>CreERT</sup>;Lgr5<sup>DTReGFP</sup>) at indicated time points, on the right barplot showing percentage of tdTomato+GFP+ double positive cells at indicated timepoints. Statistical method: Unpaired t-test, two-tailed; \*: p<0.05, \*\*: p<0.01, \*\*\*: p<0.01, \*\*\*\*: p<0.01.

## Extended Data Figure 9

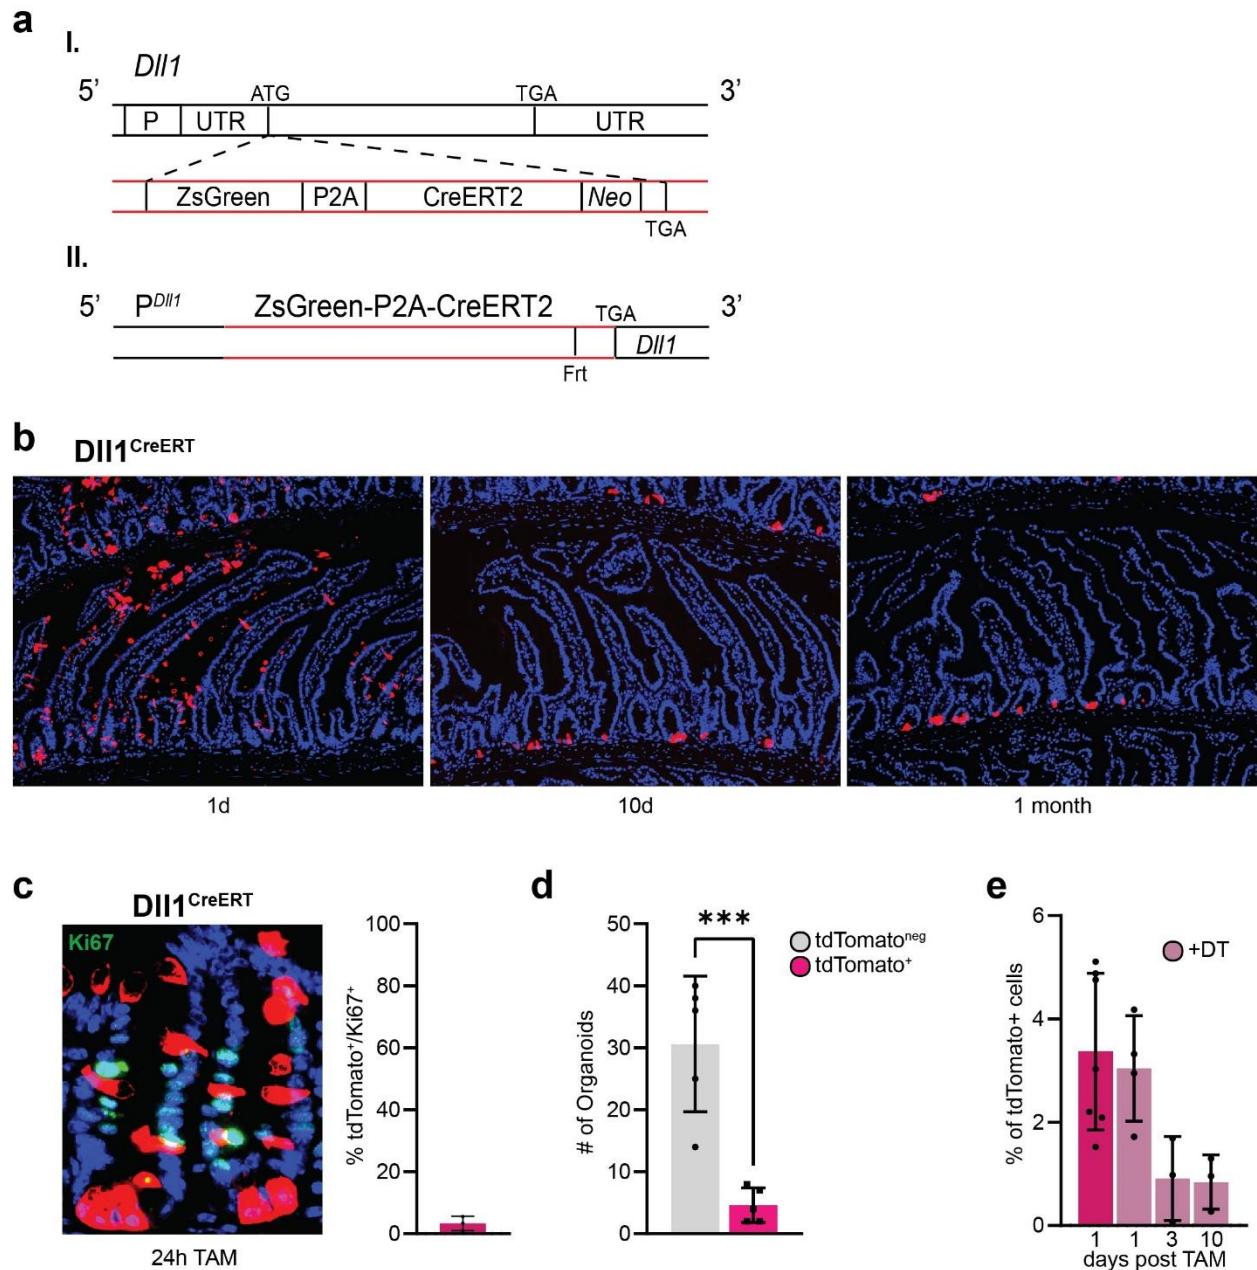

**Extended Data Figure9: a.** Designing strategy for the  $Dll1^{CreERT}$  mouse model. **b.** Representative images showing lineage tracing of  $Dll1^{CreERT}$  mice at indicated time points ( $n \geq 3$ ). **c.** Representative image for Ki67 staining (in green) and bar plot showing % of Ki67<sup>+</sup>/( $Dll1^{CreERT}$ ) tdTomato<sup>+</sup> cells. ( $n=3$ ) **d.** Bar plot showing quantification of the number of organoids generated from single sorted tdTomato<sup>neg</sup> and tdTomato<sup>+</sup> ( $Dll1^{CreERT}$ , 24h post-TAM) cells. **e.** Bar plot showing flow cytometry based quantification of ( $Dll1^{CreERT}$ ) tdTomato<sup>+</sup> cells at indicated time points. ( $n \geq 3$ ). Statistical method: Unpaired t-test, two-tailed; \*:  $p < 0.05$ , \*\*:  $p < 0.01$ , \*\*\*:  $p < 0.01$ , \*\*\*\*:  $p < 0.01$ .

## Extended Data Figure 10

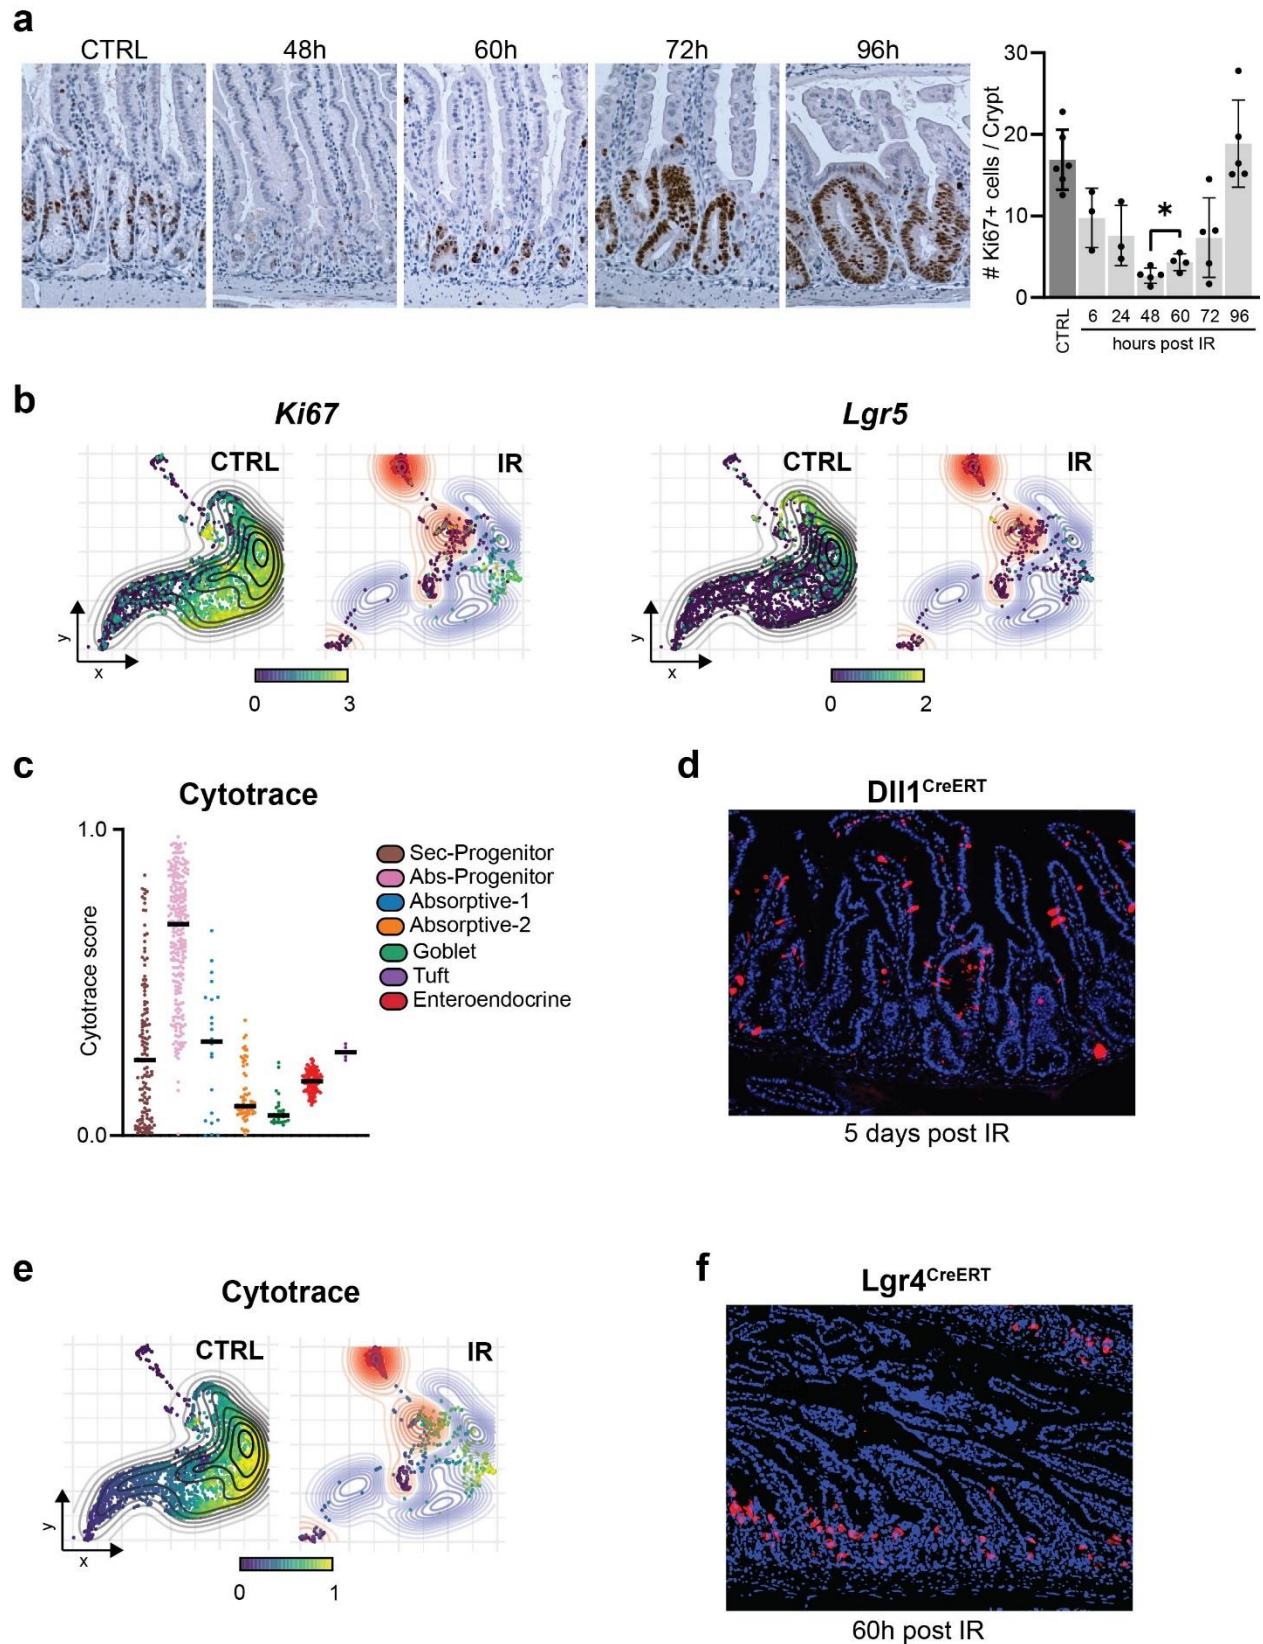



**Extended Data Figure 10:** **a.** Immunohistochemistry analysis for Ki67 following IR damage; on the right, bar plot showing quantification of the number of Ki67<sup>+</sup> cells at indicated time points. (n≥3) **b.** Differential Kernel density estimation (KDE) analysis of irradiated crypt epithelial cells, using a bootstrapped null model for the control. Showing expression for Ki67 (Left) and Lgr5 (Right). **c.** Bar plot showing computed CytoTRACE score in irradiated crypt epithelial cells relative to control. **d.** Representative images showing tracing of tdTomato<sup>+</sup> cells (DII1<sup>CreERT</sup>) five days post IR damage. **e.** KDE analysis showing computed CytoTRACE scores. **f.** Representative image of Lgr4<sup>CreERT</sup> mice 60 hours after IR damage. Statistical method: Unpaired t-test, two-tailed; \*: p<0.05, \*\*: p<0.01, \*\*\*: p<0.01, \*\*\*\*: p<0.01.

## Extended Data Figure 11

**a**

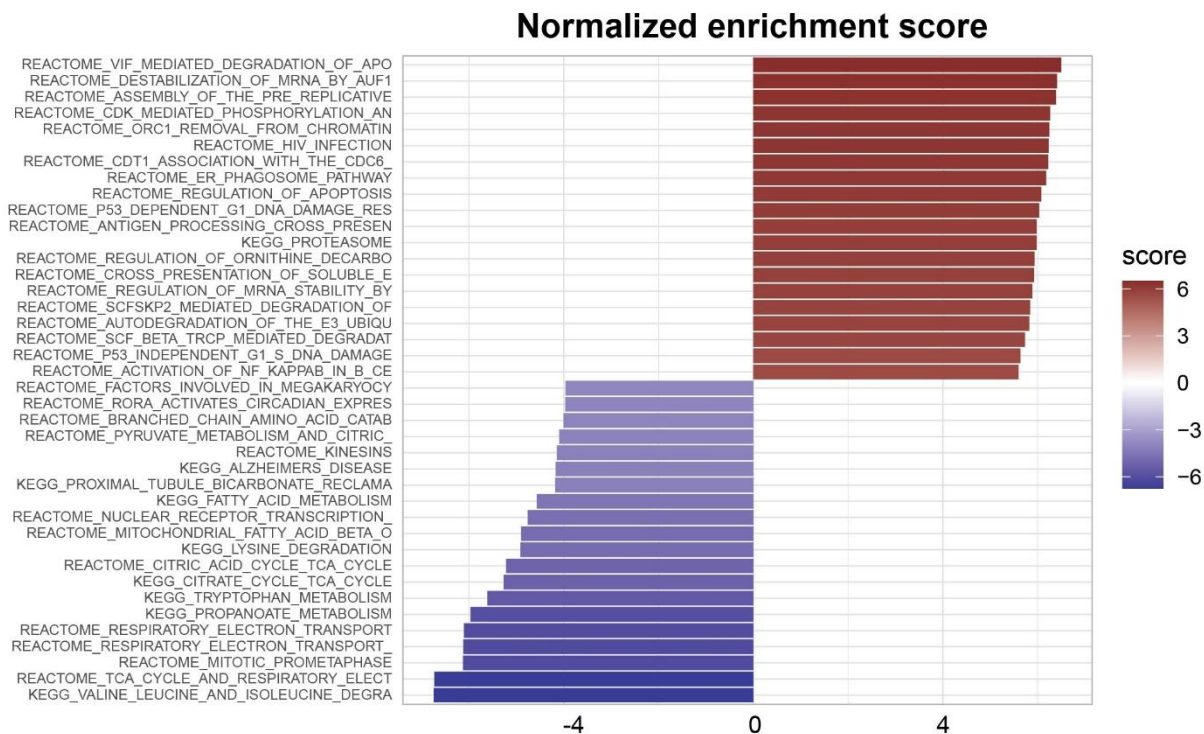

**b**

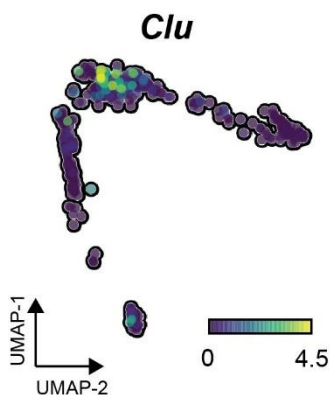

**c**

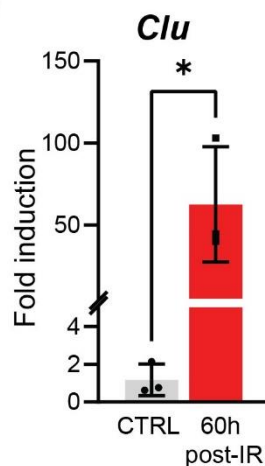

**Extended Data Figure 11: a.** Bar-plot showing gene expression-based pathway enrichment analysis. **b.** UMAP plot showing *Clu* expression in irradiated crypt epithelial cells. **c.** qPCR analysis of *Clu* expression in sorted tdTomato+ (Ki67<sup>CreERT</sup> mice) of CTRL and 60h following IR. (n=3) . Statistical method: Unpaired t-test, two-tailed; \*: p<0.05, \*\*: p<0.01, \*\*\*: p<0.01, \*\*\*\*: p<0.01.

**Extended data tables:**

**Table 1:** Mouse models used in this study

**Table 2:** Reagents and antibodies

**Table 3:** Gene expression 3-cluster Solution

**Table 4:** Protein activity 3-cluster Solution

**Table 5:** Gene expression 7-cluster Solution

**Table 6:** Protein activity 7-cluster Solution

**Table 7:** Protein activity vs CytoTRACE score correlation

**Table 8:** Gene expression vs CytoTRACE score correlation

**Table 9:** Gene expression signature (IR vs CTRL)

**Table 10:** Protein activity signature (IR vs CTRL)

## Methods:

**Animal studies:** All animal studies were carried out in compliance with the National Institutes of Health guidelines for animal research and approved by the Institutional Animal Care and Use Committee of Columbia University.

All transgenic mouse lines used in this project are listed in (Extended Data Table 1) together with their respective Tamoxifen (TAM) (Sigma, T5648) dosage. Lgr4-DSRED2-CreERT Knock-in and Dll1-ZsGreen-CreERT BAC mouse models were generated here at Irving Cancer Research Center (The Genetically Modified Mouse Models Core) using standard recombineering strategies. Inducible Cre lines were crossed with R26-tdTomato (Strain #:007909) or R26-ZsGreen (Strain #:007906) reporter allele purchased from Jax (The Jackson Laboratory). TAM was dissolved in corn oil and administered 200uL per oral gavage at indicated time points. BrdU (Biolegend, 423401) was injected i.p. at 50mg/Kg 6 hours before harvesting. Diphtheria toxin (DT - EMD Millipore, 322326) was injected i.p. at 50ug/Kg as previously described<sup>1</sup>. For irradiation studies mice received a single dose of 12Gy whole body irradiation using Mark I Cesium-137 based gamma-ray irradiator (J.L. Shepherd & Associates, San Fernando, USA).

**Crypt epithelial cell preparation and staining:** All reagents and antibodies are listed in Extended Data Table 2. 10 cm of intestinal Jejunum was harvested and cut in small pieces, EDTA (Invitrogen, 15575020) based dissociation was performed as previously described<sup>2</sup> with minor modifications. Following EDTA dissociation crypts were incubated at 37°C for 7 minutes in TrypLE Express (Thermo Fisher Scientific, 12-604-021) and DNase I (Thermo Fisher Scientific, 10104159001) in order to obtain a single cell suspension. Following enzymatic digestion cells were resuspended in Advanced DMEM/F12 (Gibco, 12634-010) supplemented with GlutMAX (Thermo Fisher Scientific, 35050061), HEPES (Thermo Fisher Scientific, 15-630-080), Antibiotic-Antimycotic (A/A - Fisher Scientific, 15240062), and 10% FBS (Gemini Bio-Products, 900-108). Cells were stained for 20 minutes Epcam-APC (1:200, BioLegend 118214), washed and re-suspended in media containing DAPI (1:10<sup>5</sup>000, BD Biosciences 564907). For B6A6<sup>3</sup> staining, cells were incubated with primary antibody for 30 minutes, following conjugated secondary Ab for 30 minutes (1:200, BioLegend 405406), washed and re-suspended in media containing DAPI.

**Flow cytometry analysis and cell sorting:** All flow cytometry analyses were performed using a LSRII Fortessa (CCTI Flow core) and results were analyzed using FlowJo. Cell sorting experiments were performed in the Columbia Stem Cell Initiative Flow Cytometry core facility at Columbia University Irving Medical Center under the leadership of Michael Kissner, using a BD

FACS Aria II. All flow cytometry quantifications are presented as percentage of Alive/Epcam<sup>+</sup> cells following standard gating strategy (Cells/SingleCells/DAPI<sup>-</sup>Epcam<sup>+</sup>).

***In vitro* organoids:** Single sorted epithelial cells were resuspended in MEDIA and counted under the microscope. Appropriate volume of cell suspension was mixed to GFR Matrigel (Corning 356231) and plated in a 24-wells plate as 25uL domes, 5000 cells/dome were seeded in all the experiments. ENR media (Advanced DMEM/F12, GlutMAX, HEPES, A/A, B27 (Thermo Fisher Scientific, 17504044), N-2 supplement (Fisher Scientific, 17502048), N-Acetyl-L-cysteine (Sigma-Aldrich, A9165), EGF (Thermo Fisher Scientific, PMG8043), Noggin (PeproTech, 250-38), Rspo1 (R&D Systems, 3474-RS-050) supplemented with CHIR (Sigma-Aldrich, SML1046) was changed every two days. Number of organoids was counted on day 5, each experiment consisted in at least 4 technical replicates and was repeated at least two times.

**Tissue processing and Immunostaining:** Intestinal jejunal segments were harvested, flushed with DPBS (Fisher Scientific, 14-190-250), cut longitudinally, and rolled around a cotton swab stick (Swissroll orientation). For cryo-preservation, tissue was fixed in 4% PFA (Electron Microscopy Sciences, 15714) overnight following 24h in 30% Sucrose (in PBS), and embedded in OCT. 5uM sections were stained with indicated Ab using standard experimental workflow. For immunohistochemistry tissue was fixed overnight in 10% buffered formalin (VWR, 89370-094) and embedded using standard experimental procedures. All embedding and sectioning was performed in the Molecular Pathology Shared Resource. IHC staining was performed using standard protocols.

**RNA extraction and qPCR:** Single sorted cells (~50'000 cells) were lysed in buffer RLT and stored at -80°C until starting the RNA isolation following manufacturer instructions (Qiagen, 74034). cDNA reaction was performed using qScript™ cDNA SuperMix (QuantaBio, 95048). qPCR analyses were performed using a QuantStudio 3 thermocycler (Applied Biosystems); gene expression is presented using the  $\Delta\Delta C_t$  method (*18S* or *Gapdh* genes used as housekeeping).

**10x scRNAseq and single cell Multiome (ATAC+RNA):** Library preparation and sequencing were performed by the JP Sulzberger Columbia Genome Centre (Single cell analysis core), using standard methodologies. For scRNA-seq crypt epithelial cells were sorted to exclude dead cells and contaminating villi (Alive/Epcam<sup>+</sup>/B6A6<sup>-</sup>). Immediately after sorting, cells were counted using an automated cell counter (ThermoFisher Countess II FL) to check viability and processed for library preparation (10x chromium). For single cell Multiome, immediately after sorting, isolated cells (>100'000) were processed to extract nuclei following manufacturer recommendation

(protocol CG000365, Rev B). Isolated nuclei were counted and quality control using an automated cell counter (ThermoFisher Countess II FL) and immediately processed for library preparation.

**Single-cell analysis of mouse intestinal crypt cells:** Single-cell RNA-seq (scRNA-Seq) UMI profiles were processed using Seurat (v.4.1.0)<sup>4</sup>. Cells with >1,000 expressed genes and mitochondrial gene content < 10% were retained for downstream analysis, yielding to 3,656 cells. UMI counts were normalized and scaled using SCTtransform from the Seurat package<sup>4</sup>. Next, a Shared Neighbors Graph (SSN) was built with knn=10 to select cells with most similar transcriptional profiles and merge them to generate high resolution ensembles of cells called metacell: this approach augments the number of detected genes per cells, which usually is very low due to dropout technological bias (<20%), thus increasing the number of targets that can be recovered by reverse-engineering regulatory networks. Metacell profiles were computed on normalized data, but merged into UMI counts and transformed to count per million (cpm) for downstream analysis. Cell doublets were identified using scanpy's implementation of scrublet<sup>5</sup>.

**Reverse-engineering of mouse intestinal crypt regulatory networks:** An intestinal stem cell (ISC)-specific regulatory network (interactome) was reverse engineered from the resulting metacell cpm profiles (n = 1,218) using ARACNe-AP<sup>6</sup>, the most recent implementation of the ARACNe algorithm<sup>7</sup>, with 200 bootstraps, a Mutual Information (MI) P-value threshold  $P \leq 10^{-8}$ , and Data Processing Inequality (DPI) enabled. A total of n = 2305 regulatory proteins (RP) were selected into manually curated protein sets, including n = 1465 Transcription Factors (TF) and n = 840 co-Transcription Factors or chromatin remodeling enzymes, using the following Gene Ontology (GO) identifiers: GO:0003700 and GO:0003712<sup>8,9</sup>. The resulting network includes 1,797 regulators, 14,935 targets and 548,442 interactions. The 3,656 scRNA-Seq profiles were transformed to protein activity profiles using the metacell-derived regulatory network and the VIPER algorithm<sup>10</sup>. To avoid bias due to different regulon sizes, regulons were pruned to include only the 50 highest likelihood targets, as recommended in<sup>10</sup>, and regulons with < 50 targets were excluded from the analysis. Next, we sought to recover cell identities by identifying clusters of cells that share the same regulatory program using the Louvain clustering algorithm applied on the protein activity profiles of cells. Using these profiles, a SSN was built with knn=15 using the first 6 Principal Component (PC) as identified by the Elbow method. We performed a grid search analysis to tune Louvain's resolution parameter to maximize the average of within-cluster Silhouette scores across each candidate optimal clustering solution. A high Silhouette score is an indication that clustered cells have homogenous profiles, hence as sampled from the same cell population. The optimal solution yielded 3 major clusters and differential markers analysis

identified the two major intestinal lineages, secretory and absorptive, with the third population appearing to correspond to stem/progenitors, based on cell potency analysis (See Cell Potency Inference paragraph) For each one of the 3 clusters, a lineage-specific regulatory network was reverse-engineered as explained above and used to recover ISC cell identities.

**Lineage-specific protein activity analysis and identification of cell identities:** Lineage-specific protein activity and clustering analysis was performed as follows. A gene expression signature (GES) was computed across all 3,656 cells by scaling the data after having normalized and variance-stabilized the UMI counts matrix using *sctransform* as implemented in the Seurat R package. Cells were computationally isolated based on their inferred lineage at the previous step. VIPER analysis was performed using cluster-specific regulatory networks and the GES as computed at the previous step. Clustering analysis was performed in a lineage-specific manner by re-running the grid search analysis on the isolated cells. The absorptive lineage was divided in two clusters, the secretory lineage in three clusters and the stem/progenitor one in two clusters. The cells from the whole datasets were then labeled based on these seven clusters. Next, the three lineage-specific VIPER analyses were merged together for all RPs that were represented across all the lineages. For the RPs that were lineage specific, we used the VIPER score from the lineage-specific regulatory network analysis. Protein activity of RPs that were not present in one of the networks were computed using metaVIPER across all the networks <sup>11</sup>.

**Cell Potency Inference:** Cell potency inference was performed using three distinct approaches. The first one, the CytoTRACE algorithm, relies on gene expression data and leverages information embedded in the number of detected genes per cell<sup>12</sup>, to compute the CytoTrace Score (CT) that we used to sort cells from the least differentiated to the terminally differentiated ones. The second approach we used builds a one-class logistic regression (OCLR) using pluripotent stem cell bulk samples (ESC and iPSC) as a predictive model to compute a Stemness Index (SI) on new samples, that we used on protein activity profiles<sup>13</sup>. The third approach, SCENT, uses protein-protein interaction networks (PPIs) and single-cell transcriptomic data to infer signaling entropy scores (SR) to use as proxy of cell differentiation potency, with the hypothesis that a cell with high signaling entropy should be endowed with higher differentiation potential<sup>14</sup>. To improve the readout of the activation status for each protein in PPIs, we utilized VIPER-inferred protein activity scores rather than gene expression. PPIs were modeled using PrePPI<sup>15</sup>, a large-scale database of human PPI, by retaining the top 5% of high confidence interactions. To convert murine gene products to human, for PrePPI network, gene identifiers were mapped to their human-mouse orthologs using R biomaRt services. To compute CT scores across pre- and post-

radiation cells, we performed bootstrap analysis by subsampling 100 times the sham dataset with the same number of cells we recovered after irradiation, in order to make them comparable. The mean CT score per cell was used for the final analysis to compare cell potency in the post-radiation sample.

**Stem Cell Markers Discovery:** Markers associated with high cell potency were inferred by correlating regulatory protein activity with CT scores. RP were prioritized based on the Pearson's correlation coefficient p-value after correction for multiple hypothesis testing using the Benjamini-Hochberg method.

**Comparison of pre and post-radiation cells:** Differential Kernel Density Estimate (KDE) was performed in the following way. Pre- and post-radiation samples were normalized independently using `sctransform` with method `glmGamPoi`. Next, the two datasets were joined together by identifying common anchors using reciprocal PCA as implemented in using Seurat (v.4.1.0) <sup>4</sup>. metaVIPER analysis was performed using the three lineage-specific networks and the scaled integrated gene expression matrix as cell specific expression signature. Next, UMAP was performed on the protein activity matrix using Euclidean as distance metric and 30 PCs. The first two UMAP dimensions were used to lay pre- and post-radiation cells on a bi-dimensional pane of 1e4 equally-sized tiles addressed by 100 intervals per UMAP dimension. The pre-radiation dataset was used to bootstrap 100 times a subset of 500 cells that were uniformly sampled to create a distribution of density estimates using a Gaussian kernel. To assess cell depletion or enrichment for each tile in the post-radiation sample, we used the positive or negative z-score computed using mean and standard deviation of the control (pre-radiation sample).

**scATAC-Seq analysis:** scATAC-Seq data was processed using ArchR<sup>16</sup>. Peak calling was performed using MACS2 with default parameters<sup>17</sup>. Cluster analysis was performed using the RNA data modality by projecting the clustering solution identified on the CTRL sample using *ingest* over *scanpy*<sup>18</sup>. *De novo* motifs enrichment analysis was performed using the *cisbp* motifs dataset and the 7-cluster solution identified over the VIPER-transformed data.

**Data availability:** scRNAseq datasets together with single cell Multiome (scRNA+scATAC seq) of crypt epithelial cells will be made available before publishing these results.

**Code availability:** All code will be available on Github or upon request at the moment of publication.



## Extended data references

- 1 Tian, H. *et al.* A reserve stem cell population in small intestine renders Lgr5-positive cells dispensable. *Nature* **478**, 255-259, doi:10.1038/nature10408 (2011).
- 2 Sato, T. *et al.* Single Lgr5 stem cells build crypt-villus structures in vitro without a mesenchymal niche. *Nature* **459**, 262-265, doi:10.1038/nature07935 (2009).
- 3 Wang, F. *et al.* Isolation and characterization of intestinal stem cells based on surface marker combinations and colony-formation assay. *Gastroenterology* **145**, 383-395 e381-321, doi:10.1053/j.gastro.2013.04.050 (2013).
- 4 Hao, Y. *et al.* Integrated analysis of multimodal single-cell data. *Cell* **184**, 3573-3587 e3529, doi:10.1016/j.cell.2021.04.048 (2021).
- 5 Wolock, S. L., Lopez, R. & Klein, A. M. Scrublet: Computational Identification of Cell Doublets in Single-Cell Transcriptomic Data. *Cell Syst* **8**, 281-291 e289, doi:10.1016/j.cels.2018.11.005 (2019).
- 6 Lachmann, A., Giorgi, F. M., Lopez, G. & Califano, A. ARACNe-AP: gene network reverse engineering through adaptive partitioning inference of mutual information. *Bioinformatics* **32**, 2233-2235, doi:10.1093/bioinformatics/btw216 (2016).
- 7 Basso, K. *et al.* Reverse engineering of regulatory networks in human B cells. *Nat Genet* **37**, 382-390, doi:10.1038/ng1532 (2005).
- 8 Ashburner, M. *et al.* Gene ontology: tool for the unification of biology. The Gene Ontology Consortium. *Nat Genet* **25**, 25-29, doi:10.1038/75556 (2000).
- 9 Margolin, A. A. *et al.* ARACNE: an algorithm for the reconstruction of gene regulatory networks in a mammalian cellular context. *BMC Bioinformatics* **7 Suppl 1**, S7, doi:10.1186/1471-2105-7-S1-S7 (2006).
- 10 Alvarez, M. J. *et al.* Functional characterization of somatic mutations in cancer using network-based inference of protein activity. *Nat Genet* **48**, 838-847, doi:10.1038/ng.3593 (2016).
- 11 Ding, H. *et al.* Quantitative assessment of protein activity in orphan tissues and single cells using the metaVIPER algorithm. *Nat Commun* **9**, 1471, doi:10.1038/s41467-018-03843-3 (2018).
- 12 Gulati, G. S. *et al.* Single-cell transcriptional diversity is a hallmark of developmental potential. *Science* **367**, 405-411, doi:10.1126/science.aax0249 (2020).
- 13 Malta, T. M. *et al.* Machine Learning Identifies Stemness Features Associated with Oncogenic Dedifferentiation. *Cell* **173**, 338-354 e315, doi:10.1016/j.cell.2018.03.034 (2018).
- 14 Teschendorff, A. E. & Enver, T. Single-cell entropy for accurate estimation of differentiation potency from a cell's transcriptome. *Nat Commun* **8**, 15599, doi:10.1038/ncomms15599 (2017).
- 15 Zhang, Q. C. *et al.* Structure-based prediction of protein-protein interactions on a genome-wide scale. *Nature* **490**, 556-+, doi:10.1038/nature11503 (2012).
- 16 Granja, J. M. *et al.* ArchR is a scalable software package for integrative single-cell chromatin accessibility analysis. *Nat Genet* **53**, 403-411, doi:10.1038/s41588-021-00790-6 (2021).
- 17 Gaspar, J. M. Improved peak-calling with MACS2. *BioRxiv*, 496521 (2018).
- 18 Wolf, F. A., Angerer, P. & Theis, F. J. SCANPY: large-scale single-cell gene expression data analysis. *Genome Biol* **19**, 15, doi:10.1186/s13059-017-1382-0 (2018).
